1 **Title :**

2 **Oscillation-driven memory encoding, maintenance and recall in an**  
3 **entorhinal-hippocampal circuit model**

4

5 **Authors**

6 Tomoki Kurikawa<sup>1</sup>, Kenji Mizuseki<sup>2</sup>, and Tomoki Fukai<sup>3,4</sup>

7

8 1. Department of Physics, Kansai Medical University, Hirakata, Osaka 573-1191, Japan

9 2. Department of Physiology, Osaka City University Graduate School of Medicine,  
10 Abeno-ku, Osaka, 545-8585, JAPAN

11 3. Okinawa Institute of Science and Technology, Onna-son, Okinawa 904-0495, Japan

12 4. RIKEN Center for Brain Science, Wako, Saitama 351-0198, Japan

13

14

15 **Abstract**

16 **Coherent neuronal activity phase-locked to theta and gamma oscillations is thought**  
17 **to be crucial for information processing across multiple brain regions. However, the**  
18 **network mechanisms underlying the oscillation-driven multi-area computation**  
19 **remains largely unclear. To explore such mechanisms, we constructed a hippocampal-**  
20 **entorhinal neural network model involving parvalbumin-positive, somatostatin-**  
21 **positive and vasoactive intestinal polypeptide interneurons in the hippocampal area**  
22 **CA1 and the superficial and deep layers of the entorhinal cortex. We examined the**  
23 **model behavior by using neural activity data recorded during delayed nonmatching**  
24 **to place tasks. Our model shows that experimentally observed relative phases of**  
25 **theta oscillation ensure working memory performance. Moreover, the model**  
26 **predicts that acetylcholine concentrations in these areas modulate the balance**  
27 **between intra-area and inter-area information processing according to cognitive**  
28 **demands emergent at encoding, maintenance and recall epochs of a working**  
29 **memory task. Our model suggests the active role of theta-phase-locked firing and**  
30 **cholinergic modulations for multi-area memory processing.**

31

32

33 **Acknowledgement**

34 We thank Jun Yamamoto for providing experimental data and fruitful discussion and György

35 Buzsáki for publicly sharing the valuable data. This work was supported by KAKENHI (nos.

36 18H05213 and 19H04994) from the MEXT.

37

38 Spatial navigation is a fundamental cognitive function that requires the processing of  
39 spatial memory by the hippocampus and entorhinal cortex. During a spatial navigation  
40 task, spatial information relevant to the task has to be encoded into, maintained in and  
41 recalled from spatial working memory at adequate times. How these operations are  
42 coordinated by the cortico-hippocampal neural circuits during a spatial working  
43 memory task has to be yet explored.

44

45 A spatial working memory task is processed by several cortical areas such as the medial  
46 prefrontal cortex (mPFC) (Benchenane et al., 2010; Jones and Wilson, 2005; Spellman  
47 et al., 2015), medial entorhinal cortex (MEC)(Suh et al., 2011; Yamamoto et al., 2014)  
48 and the hippocampal area CA1 (Benchenane et al., 2010). These anatomically  
49 connected areas (Eichenbaum, 2017; Swanson and Cowan, 1977; Witter et al., 2000)  
50 are thought to mutually communicate information necessary to accomplish the task.  
51 Interestingly, the degree of functional importance of different inter-area connections  
52 varies during the task. This is suggested because the impairment of these connections  
53 at different behavioral phases differentially influenced task performance (Spellman et  
54 al., 2015; Suh et al., 2011; Yamamoto et al., 2014). For instance, in a delayed  
55 nonmatching to place task (DNMP), the maintenance of spatial memory during a delay  
56 period does not require synaptic connections from the layer 3 of the MEC (MECIII) to  
57 CA1, but these connections are necessary for memory recall(Yamamoto et al., 2014).  
58 Connections from CA1 to the mPFC play a crucial role in memory encoding but not in  
59 memory recall (Spellman et al., 2015). These results indicate that information flows via  
60 the hippocampal circuit are not static but are dynamically regulated depending on the  
61 behavioral demands.

62

63 Coherence in neuronal activity between different areas likely reflects dynamic  
64 information routing across multiple areas (Spellman et al., 2015; Yamamoto et al.,  
65 2014), which leads to the hypothesis called “communication through coherence”(Fries,  
66 2015). Many theoretical (Akam and Kullmann, 2010; Buehlmann and Deco, 2010;  
67 Palmigiano et al., 2017; Vogels and Abbott, 2005; Yang et al., 2016) and experimental

68 (Letzkus et al., 2015; Womelsdorf et al., 2014) studies have explored the gating  
69 functions for this dynamic processing. However, how the computations installed at  
70 multiple cortical areas are integrated to execute a spatial working memory task  
71 remains largely unclear. In addition, the mechanistic role of theta and gamma  
72 oscillations in this process has not been fully understood.

73

74 Here, we elucidated the underlying mechanisms of multi-area dynamic information  
75 processing during spatial navigation. In so doing, we constructed a biologically  
76 plausible model of the entorhinal-hippocampal circuit consisting of MECIII, CA1 and  
77 MEC layer V (MECV). We show that the model successfully reproduces a wide range of  
78 behavioral and electrophysiological observations reported from a DNMP task  
79 (Yamamoto et al., 2014). We further confirmed the validity of the model by using data  
80 from another DNMP task (Fernández-Ruiz et al., 2017; Mizuseki et al., 2013).  
81 Importantly, our model predicted the crucial role of cholinergic modulations in  
82 regulating information flow dynamics of the MECIII-CA1-MECV circuit. Acetylcholine  
83 (ACh) is related to cognitive states (Hasselmo and Sarter, 2010; Parikh et al., 2007) in  
84 many behavioral tasks including fear conditioning (Letzkus et al., 2011; Pi et al., 2013),  
85 sensory discrimination (Hangya et al., 2015; Pinto et al., 2013), associative memory  
86 (Sabec et al., 2018), and spatial (Croxson et al., 2011; Okada et al., 2015) and non-  
87 spatial working memory tasks (Furey et al., 2000; Hasselmo, 2006; McGaughy et al.,  
88 2005). Consistent with the regulatory role, cholinergic inputs from the medium septum  
89 (MS) project broadly to distinct cortical areas including the hippocampus. In our  
90 model, cholinergic modulations were necessary to perform the three important stages  
91 of memory processing, i.e., encoding, storing, and decoding spatial information and  
92 were implemented by disinhibitory mechanisms.

93

## 94 **Results**

### 95 **Hippocampus-entorhinal cortex circuit model**

96 To understand the circuit mechanisms to control flexibly spatial information in the  
97 hippocampus and MEC, we built an inter-areal cortical network model (Figure 1A, see

98 Supplemental materials for details). The network comprises three main areas CA1, MEC  
99 layer 3 (MECIII) and layer 5 (MECV), and additional areas CA3, MEC layer 2 (MECII) and  
100 medial septum (MS) as external inputs. All main areas have excitatory (E) and  
101 parvalbumin (PV)-positive interneurons. In addition to these neurons, the model CA1  
102 has somatostatin (SOM)-positive oriens-lacunosum moleculare (OLM) and vasoactive  
103 intestinal polypeptide (VIP) neurons. We built synaptic connections in our model based  
104 on anatomical observations (Gonzalez-Sulser et al., 2014; Unal et al., 2015; Witter et  
105 al., 2000). In addition, we assumed that E neurons in MECII project to PV neurons in  
106 MECIII, as previously suggested (Mizuseki et al., 2009).

107

108 Exc, PV and OLM neurons constitute the core circuits of the present network model  
109 and were modeled as Hodgkin-Huxley-type conductance-based neurons according to  
110 previous models (Middleton et al., 2008; Rotstein et al., 2006; Wang and Buzsáki, 1996;  
111 Wulff et al., 2009). VIP neurons were modeled as Poisson firing neurons with the  
112 probability density of spikes described and their outputs mediate the modulatory  
113 effect of acetylcholine (ACh). We described CA3 excitatory neurons projecting to CA1,  
114 MECII E neurons projecting to MECIII, and GABAergic neurons in MS projecting to CA1  
115 and MECV as external Poisson spike trains. As shown in Figure 1B, the firing  
116 probabilities of these neurons were modulated at the theta frequency (10Hz) to induce  
117 theta rhythmic activities in the core circuits. The relative preferred phases of the theta  
118 rhythm of the external inputs were adjusted based on experimental observations  
119 (Klausberger and Somogyi, 2008; Mizuseki et al., 2009). Furthermore, from these  
120 phases and experimental observations, we set the theta phase of the local field  
121 potential (LFP) to be observed in the stratum pyramidale (SP) of CA1. Although this LFP  
122 was not directly calculated from the modeled CA1 activities, the quantity was used as a  
123 reference to measure the degree of agreement between the preferred phases of model  
124 neurons and experimental observations. The preferred phases of GABAergic neurons in  
125 MS were dependent on their target neuron types (ECV PV, CA1 PV and CA1 OLM). In  
126 experiment, GABAergic neurons projecting to OLM and those projecting to PV in CA1  
127 have different preferred phases (Borhegyi, 2004).

128

129 Acetylcholine is known to modulate activity of VIP neurons (Albuquerque et al., 2009)  
130 and the conductance of a calcium-sensitive non-specific cation current (CAN) in MECV  
131 excitatory cells (Fransen et al., 2002; Fransén et al., 2006) in a manner depending on  
132 the concentration of ACh ([ACh]). In this study, we test the hypothesis that [ACh] varies  
133 in correlation with cognitive demands to perform encoding, maintenance and decoding  
134 spatial working memory. We demonstrate that the cholinergic modulations of  
135 disinhibition of CA1 E neurons and calcium dynamics in MECV E neurons enable the  
136 flexible processing of spatial working memory. Cholinergic neurons in MS ((Newman et  
137 al., 2012; Zhang et al., 2010) were not explicitly modeled.

138

139 For Poisson neurons in CA3, MECII and MS, their preferred phases of theta oscillation  
140 for the default [ACh] (Figure 1D) were chosen to be consistent with experimental  
141 observations (Borhegyi, 2004; Klausberger and Somogyi, 2008; Mizuseki et al., 2009).  
142 Given this condition, all neurons in CA1, MECIII and MECV fired in theta-rhythmic  
143 manners (Figure S1A). As observed in experiments, E and OLM neurons in CA1 showed  
144 preferred phases around the troughs of theta oscillation, whereas PV neurons around  
145 the peaks (Klausberger and Somogyi, 2008). In MECIII, E and PV neurons fired  
146 preferentially around the peaks and troughs of theta oscillation, respectively (Mizuseki  
147 et al., 2009). In MECV, PV neurons preferred the troughs, but E neurons did not show  
148 strong phase preferences (Mizuseki et al., 2009). These results show that theta phase-  
149 locked firing in our model is biologically plausible.

150

### 151 **Encoding spatial information into theta rhythmic firing**

152 The central question of this study is to clarify how spatial information is encoded,  
153 maintained and recalled in the entorhinal-hippocampal circuits. To study this problem,  
154 we asked whether our model can replicate the task-related activities reported in  
155 previous experiments. In particular, we considered a DNMP task on a T-maze  
156 (Yamamoto et al., 2014). In this experiment, one arm of the T-maze was closed during  
157 a sample run and the rat was forced to choose another arm. After a delay period, the

158 rat was set to a test run in which both arms were open and the rat had to choose the  
159 arm opposite to the one chosen in the preceding sample run (that is, if the rat chose  
160 the right arm in the sample run, it had to choose the left arm in the test run). For a  
161 successful test run, the rat had to remember the previously chosen arm. This task  
162 requires at least two types of memory, namely, rule-based memory and spatial working  
163 memory. The former memory is thought to be encoded in the prefrontal cortex  
164 (Durstewitz et al., 2010; Guise and Shapiro, 2017; Preston and Eichenbaum, 2013).  
165 However, in this study we did not model the prefrontal circuits and focused on the  
166 processing of spatial working memory in the entorhinal-hippocampal circuits.

167

168 Figure 1C shows the organization of sample and test runs in our model together with  
169 the connectivity patterns between the neural ensembles encoding different locations  
170 on the maze. We monitored the activity of sample runs along the center arm (sample-  
171 C) and left arm (sample-L), and that of test runs at the home position (delay) and  
172 center arm (test-C) up to the junction (decision point) of the T-maze. For the sake of  
173 simplicity, we implemented four subgroups L, R, C and H of place cells in CA3, each of  
174 which represented the current position of the model rat on the left, right, center arms  
175 and at the home position, respectively. For instance, neurons belonging to the  
176 subgroup L were given a higher firing probability when the model rat traveled across  
177 the left arm (Figure 1D; also see "Neuron models" in STAR methods). Accordingly, E  
178 neurons in CA1 were also divided into four subgroups L, R, C, and H, each of which was  
179 strongly projected to by the corresponding subgroup in CA3. In contrast, MECIII and  
180 MECV had two subgroups denoted as L and R, and these subgroups were assumed to  
181 form closed loop circuits with the corresponding CA1 subgroups. The other positions  
182 on the maze that are not shown in Figure 1C were not modeled.

183

#### 184 **Role of theta oscillation in coordinating activities in the CA1-MECV-MECIII loop circuit**

185 Experimental results showed that theta-phase-locked firing in MECIII is highly  
186 correlated with the task performance (Yamamoto et al., 2014). Therefore, we  
187 hypothesized that the L and R subgroups in MECIII contributes to the success of spatial

188 working memory task and defined task performance as difference in neural activity  
189 between these subgroups at the test-C period. The larger the difference is, the more  
190 robust the memory encoding is. Below, we consider the case, without loss of  
191 generality, that the rat chooses the left arm in every sample trial. In Figure 1D, we  
192 demonstrated activities of E neurons in CA3, CA1, MECV and MECIII together with  
193 [ACh] during (1) sample-C, (2) sample-L, (3) home (delay) and (4) test-C runs.  
194 Depending on the rat's position, the corresponding subgroup was activated in CA3.  
195 During the sample-L run, [ACh] was increased, which disinhibited CA1 PV neurons and  
196 accordingly strongly activated the CA1-MECV-MECIII loop circuit of the L subgroups to  
197 encode a choice memory in MECIII. Then, in the delay period, [ACh] was slightly  
198 decreased, which strongly suppressed neural activities in all L subgroups including the  
199 CA1 subgroup L. We note that a similar suppression arose in experiment as if spatial  
200 memory had not been maintained during delay periods (Yamamoto et al., 2014).  
201 During the test-C run, the CA1 subgroup C was activated driven by the CA3 subgroup C.  
202 Importantly, as the model rat approached to the decision point, the subgroups L were  
203 gradually reactivated in the loop circuit to retrieve the memory of the previous choice.  
204 This activation-suppression-reactivation pattern is clearly seen in the firing rate of  
205 MECIII neurons. Average firing rates during the test-C period were significantly  
206 different ( $p=3.071 \times 10^{-6}$ , *t* test on two related samples) between the subgroups L and R  
207 in MECIII (Figure 1E), implying that the network model successfully recalled the stored  
208 spatial memory.

209

210 The successful encoding of memory required theta-phase-locking of neural firing along  
211 the CA1-MECV-MECIII loop circuit. As mentioned previously, the theta phases of  
212 external sources (i.e., CA3, MECII and MS) entrain neurons in these areas in theta-  
213 phase-locked firing with the preferred phases that are consistent with experimental  
214 observations. In the normal situation, MECIII PV neurons are activated by input from  
215 MECII at the bottoms of theta oscillation and consequently MECIII E neurons tend to  
216 fire at the peaks. Then, CA1 E neurons are strongly activated in non-linear  
217 manner (Bittner et al., 2015; Takahashi and Magee, 2009) by near-coincident inputs



218 from MECIII and CA3: spikes from CA3 arrive at CA1 at the descending phases of theta  
219 oscillation just after spikes from MECIII (see STAR Methods).

220

221 The theta phases of inputs from different sources need to be well coordinated for  
222 successful working memory function. To examine this, we shifted the preferred phases  
223 of MECII neurons by 180 degrees from the troughs to the peaks of the reference theta  
224 oscillation of CA1 LFP (Figure S1B). Figure S1C shows the phase preferences of CA3,  
225 CA1 E, CA1 PV, and MECIII E neurons after this change. MECIII PV neurons dramatically  
226 reduced spikes at the descending phases of theta oscillation, which shifted the firing of  
227 MECIII E neurons to the troughs of theta oscillation. Consequently, the peak activities  
228 of MECIII and CA3 were separated by about one half of theta cycle and did not  
229 coincidentally innervate CA1. The timing deviation impaired the encoding of spatial  
230 information into the loop circuit, as indicated by significantly reduced rate differences  
231 between L and R subgroups (Figure S1D,  $p = 2.679 \times 10^{-16}$ ,  $t$  test on two related samples),  
232 resulting in a degraded task performance (Figure 1F,  $p = 2.334 \times 10^{-8}$ ,  $t$  test on two  
233 related samples). Thus, theta oscillation is crucial for the appropriate temporal  
234 coordination of neuronal firing in the entorhinal-hippocampal circuit.

235

236 **Figure 1. Entorhinal-hippocampal network model.** (A) The structure of the network  
237 model is schematically illustrated. (B) Theta-modulated firing probabilities of input  
238 neurons are shown during the sample-center run. The preferred firing phases were  
239 determined with respect to a reference theta oscillation (black) reported in the CA1  
240 stratum pyramidale (SP) layer. (C) Left; Schematic illustrations of task periods during  
241 the sample and test trials of the DNMP T-maze task: (1) sample-C, (2) sample-L, (3)  
242 home (delay), (4) test-C periods. Right; Synaptic connectivity is shown between the  
243 neuron subgroups encoding the specific locations of the maze (left, right, center arms  
244 and home position). Connections (bold) are stronger within the loop circuit of MECV,  
245 MECIII and CA1 than other modest connections (solid). (D) Raster plots of E neurons in  
246 different cortical areas are shown together with the time evolution of ACh  
247 concentration. (E) The average firing rates of MECIII L and R subgroups were calculated

248 for the test-C period in five different networks with five different initial conditions  
249 (black lines). Unless otherwise stated, average firing rates were evaluated in a similar  
250 fashion throughout this study. (F) Probability of left choice ( $P_L$ ) and average of  $P_L$  was  
251 calculated in the normal and modified conditions. Gray dots show  $P_L$  of different  
252 networks for different initial conditions. Here,  $P_L = e^{-r_L} / (e^{-r_L} + e^{-r_R})$ , where  $r_L, r_R$   
253 are firing rate of L and R subgroups in test-C period, respectively. Chance level is 0.5.

254

255 **Figure S1 (related to Figure 1). Activity of various types of neuron during task.** (A)

256 Preferred phases of various neuron types during the sample-C period. The firing rates  
257 were calculated by numerical simulations for excitatory and inhibitory neurons in the  
258 entorhinal-hippocampal circuit. The reference theta oscillation presumed in the SP  
259 layer of CA1 is also shown (solid lines). (B) Theta-modulated firing probabilities of ECII  
260 neurons for the normal and preferred phase shift conditions are shown. (C)  
261 Modulations of spike counts by theta oscillation are shown for CA1 E, MECIII E and  
262 MECIII PV neurons during the sample-L period. Neuronal activities in the normal and  
263 preferred phase shift conditions of theta oscillation are shown with dark and light  
264 colors, respectively. (D) Differences in the firing rate between the L and R subgroups of  
265 CA1 E neurons were calculated during the sample-L period and compared between the  
266 normal and the phase shift conditions. Simulation results for the same initial conditions  
267 are connected with lines.

268

269 **The role of disinhibition in regulating the activity of the CA1-MECV-MECIII loop circuit**

270 We show that the ACh-mediated disinhibitory mechanisms regulate cross-area  
271 communications within the entorhinal-hippocampal circuit during different task  
272 periods. We first analyzed how CA1 neurons selectively encode spatial information  
273 from CA3. We consider the default state (i.e., 0 to 1 sec in Figure 1D) in which [ACh] is  
274 low (Figure 2A). In this state, output from VIP neurons is weakened and, consequently,  
275 PV neurons are strongly activated around the peaks of theta oscillation (Figure 2B).  
276 Accordingly, CA1 E neurons rarely fire around the peaks (but they can generate a small  
277 number of spikes driven by external noise after the troughs of theta oscillation at

278 which inputs from both PV and OLM are weakened: see Figure S1A). In contrast, during  
279 the epochs of high [ACh] (Figure 2D, the sample-L period: the test-C period also  
280 corresponds to the high [ACh] epoch, but will be discussed later), CA1 E neurons show  
281 strong activation immediately after the peaks of theta oscillation because PV neurons  
282 are suppressed around the peak (Figure 2E). OLM neurons are also suppressed, but  
283 their inhibitory effect on E-neuron firing around the peak is relatively weak since the  
284 preferred phase of OLM neurons is the trough of theta. Thus, the cholinergic  
285 modulation advances the preferred phase of CA1 E neurons from the troughs to the  
286 peaks of theta oscillation. Later, we will examine the model's prediction in  
287 experimental data.

288

289 Information on the current position of the rat can be transferred from CA3 to CA1 only  
290 when [ACh] is sufficiently high. Throughout the task, CA1 E neurons constantly receive  
291 position information from CA3 which changes as the rat moves on the maze. During  
292 encoding epoch, a certain mechanism is required to enable CA3 inputs to activate CA1  
293 neurons in the sample-L period (see the CA1 L subgroups in Figure 1D). ACh-induced  
294 disinhibition provides this mechanism: at the sample-C period [ACh] is low and the  
295 sensitivity of CA1 E neurons to CA3 input remains low, consequently the position  
296 information is not transferred to CA1; at the sample-L period [ACh] is increased and  
297 accordingly the sensitivity is also enhanced, resulting in an information transfer  
298 (Figures 2C and 2F).

299

300 The disinhibition mechanism further explains why the blockade of MECIII-to-CA1  
301 connections impaired task performance in experiment (Yamamoto et al., 2014). When  
302 the model rat is sampling left or right arm, the disinhibition mechanism enables the  
303 activation of the corresponding subgroups in the CA1-ECV-ECIII loop: highly activated  
304 CA1 neurons activate MECV E neurons, which in turn activate MECIII E neurons. MECIII-  
305 to-CA1 projections further activate CA1 E neurons, thus completing a positive feedback  
306 loop within the activated subgroups. However, the blockade of MECIII-to-CA1  
307 connections reduces neural activity in CA1 and hence in MECIII, disabling the storage of

308 the current position.

309

310 To confirm the crucial roles of disinhibition (i.e., VIP-PV-E and VIP-OLM-E connections)  
311 in the working memory task, we studied two cases. In the first case, PV neurons were  
312 inactivated in CA1 during the entire trial period without changing the other conditions  
313 (Figure S2A). Due to the lack of inhibition from PV neurons, CA1 E neurons were  
314 strongly activated at any ACh concentration. In the encoding epoch, E neurons  
315 exhibited higher activity in the L subgroup than in the R subgroup in both CA1 (Figure  
316 S2B) and MECIII (Figure S2C, 1 to 3 sec). However, after this epoch E neurons immediately  
317 lost selectivity to spatial information because they were too strongly activated in both  
318 subgroups. During some intervals firing rate was higher in the L subgroup than in the R  
319 subgroup, but it was opposite during other intervals (Figure S2C, after 3 sec). Thus, the  
320 spatial information recalled randomly varied from trial to trial, and working memory  
321 performance was unreliable (Figure S2D).

322

323 In the second case, the cholinergic modulation of PV neurons (but not that of OLM  
324 neurons) was terminated during the entire trial period. In this case, PV neurons were  
325 not inactivated even at high [ACh] (Figure S2E) and the encoding of spatial information  
326 into CA1 was largely impaired (Figure S2F). Consequently, spatial information could not  
327 be stably maintained in MECIII (Figure S2G) and probability of left choice,  $P_L$ , was  
328 significantly decreased (Figure S2H,  $p=1.542 \times 10^{-9}$ ,  $t$  test on two related samples). Thus,  
329 in both cases, spatial information in CA3 was not successfully transferred into the CA1-  
330 MECV-MECIII loop circuit.

331

332 **Figure 2. Gating of CA3-to-CA1 signaling by disinhibition mechanism.** (A) The  
333 operation mode of disinhibitory circuit is schematically illustrated in low [ACh] states.  
334 (B) Theta phase preferences of spiking during the sample-C period are shown for CA1  
335 neurons. Only for VIP neurons, the firing rate normalized by [ACh], which corresponds  
336 to output from VIP neurons to other inhibitory neurons (see the STAR method), is  
337 plotted. Solid curves show the reference theta oscillation. (C) Average firing rates of

338 the L, R, C and H subgroups in CA3 and CA1 are shown during the sample-C period. (D)  
339 The operation mode of disinhibitory circuit in high [ACh] states. (E, F) Similar to (B) and  
340 (C) during the sample-L period.

341

342 **Figure S2 (related to Figure 2). Effect of inactivation of disinhibition mechanism.** (A)

343 Firing rates of CA1, CA3 and MECIII neurons during sample-L periods are shown. During  
344 the simulations, CA1 PV neurons were inactivated. Solid curves indicate the reference  
345 theta oscillation. (B) Average firing rates of CA1 E neurons in different subgroups are  
346 plotted during sample-L periods in the same inactivating condition. (C) Raster plots are  
347 shown for the L (blue) and R (orange) subgroups of MECIII E neurons. (D) Probability of  
348 left choice is plotted in the normal and inactivating conditions. Lines connect two data  
349 points obtained from simulations of a normal network and its impaired version with  
350 the same initial conditions. (E, F, G, H) same as (A) to (D), but for the network models  
351 with disabled VIP-to-CA1 PV connections.

352

353 **Covert activation by calcium dynamics**

354 An unexpected experimental finding was that neural activities in MECIII were strongly  
355 suppressed during delay periods (Yamamoto et al., 2014). This observation challenges  
356 our hypothesis that either MECV or MECIII, or both, serve for working memory in the  
357 spatial decision making task, raising the question about how the entorhinal-  
358 hippocampal circuit recalls the encoded spatial information after the delay periods. To  
359 explore the underlying circuit mechanisms of memory recall, we implemented calcium-  
360 sensitive non-specific cation current (CAN current in STAR Methods) in our cortical  
361 neuron models.

362

363 The CAN current was originally proposed to explain persistent activity of single cortical  
364 neurons in MECV (Fransen et al., 2002; Fransén et al., 2006), and a similar persistent  
365 activity was later shown in the layer V of various cortical areas (Rahman and Berger,  
366 2011). The CAN current is activated in the presence of ACh with the intensity  
367 depending on the activation rate of high conductance channels,  $r_H$ . The conductance  $r_H$

368 is linearly increased when the calcium concentration  $[Ca^{2+}]$  is beyond a critical value  $d_p$   
369 and decreased when  $[Ca^{2+}]$  is below another critical value  $d_D$ . Because  $d_D < d_p$ , a  
370 hysteresis effect or bistability appears for  $d_D < [Ca^{2+}] < d_p$ . Thus, once  $[Ca^{2+}]$  exceeds  $d_p$ ,  
371 the value of  $r_H$  remains high until  $[Ca^{2+}]$  again decreases below  $d_D$  (Figure 3A). Neurons  
372 with high  $r_H$  respond to input more sensitively than those with low  $r_H$  and, thus,  
373 memory of previous high activity is stored in  $r_H$  through calcium dynamics.

374

375 In the sample-L period, an increased activity of the CA1 subgroup L enhanced spike  
376 firing of MECV E neurons in the subgroup L (Figure 3B). During the enhanced firing,  
377  $[Ca^{2+}]$  was elevated in these neurons by calcium influx through the voltage-dependent  
378 calcium channel. This increase of  $[Ca^{2+}]$  occurred only in the MECV subgroup L but not  
379 in the MECV subgroup R (Figure 3C). After the sample-L period,  $[ACh]$  was decreased  
380 and, consequently, the CAN current was also decreased. Because lowering  $[ACh]$   
381 decreased the output of VIP neurons, that of PV neurons was increased and  
382 consequently that of CA1 E neurons was suppressed. Thus, the changes in neural  
383 activity resulted in a decreased firing rate of MECV E neurons. Nevertheless, the  
384 fraction of high conductance state remained high in the subgroup L (but not in the  
385 subgroup R) of MECV E neurons (Figure 3C).

386

387 The CAN current plays a crucial role in the maintenance of working memory. To explain  
388 this, we divided the test-C period into early and late periods: in the early period CA1  
389 neurons were selectively activated in the subgroup C but not in the subgroup L (and  
390 subgroup R); in the late period they were strongly activated in the subgroup L (Figure  
391 3B). During the test-C period,  $[ACh]$  was again increased, so was the activity of CA1 E  
392 neurons through the disinhibition mechanism. Although MECV neurons in both  
393 subgroups L and R received synaptic input from the CA1 subgroup C, MECV neurons  
394 were selectively activated in the subgroup L because the high conductance rate  
395 remained high in these neurons. The activity of the MECV subgroup L neurons  
396 gradually increased in the early test-C period, and eventually became sufficiently  
397 strong to activate MECV subgroup L neurons. Accordingly, the test-C period entered

398 the late period and the spatial information stored in MECV could be decoded by CA1  
399 neurons. The onset time of the late period depends on the realization of neural  
400 networks and initial conditions. Thus, the covert activation of CAN current enables the  
401 retrieval of persistent activity in the MECV subgroup L neurons for the decoding of  
402 spatial information in the test-C period.

403

404 **Figure 3. Role of CAN current in memory encoding and maintenance.** (A) Single trial  
405 evolution of the membrane potential (top),  $[Ca^{2+}]$  (middle) and the ratio of high  
406 conductance state of CAN current (bottom) are plotted in an MECV excitatory neuron.  
407 Dots above the membrane potential represent spikes. Broken lines denote two  
408 threshold values,  $d_p$  and  $d_b$ , in the middle panel and the upper and lower critical values  
409 of the high conductance ratio in the bottom panel (See STAR method). (B) Firing rates  
410 are shown for E neurons in CA1, MECIII and MECV. Colors indicate different neuron  
411 subgroups. (C) Time evolution of  $[Ca^{2+}]$  (top) and the high conductance ratio (bottom)  
412 are plotted for randomly-chosen five MECV E neurons belonging to L (blue) or R  
413 (orange) subgroup during the same trial as in B.

414

### 415 **Comparison of MECIII neural activity between the model and experiment**

416 We compared the responses of our model with those of the rat entorhinal-  
417 hippocampal circuit. For this comparison, we analyzed E neuron activity in MECIII after  
418 dividing each of the sample-L, delay and test-C periods into early and late portions,  
419 respectively. As in experiment (Yamamoto et al., 2014), we first quantified the intensity  
420 of theta oscillation in these task periods by computing periodicity index. As shown in  
421 Figure 4A, this index was high during the late sample-L, early delay, and late test-C  
422 periods, but it was low during delay period (i.e., late delay and early test-C periods).  
423 Periodicity index exhibited similar task period-dependence in the model and  
424 experiment (c.f. Figure 5C and Figure S5 in (Yamamoto et al., 2014)).

425

426 We next analyzed how the blockade of MECIII-to-CA1 projection affects the behavior of

427 our model in different task periods. In the experiment, this blockade significantly  
428 impaired working memory performance of the rat. When MECIII-to-CA1 projection was  
429 blocked during the encoding epoch (sample-L period), MECIII activity and the firing rate  
430 difference between L and R subgroups were suppressed during both sample-L and the  
431 subsequent late test-C periods (Figure 4B, blue), meaning that task performance was  
432 impaired. When the blockade was during the recall epoch (late test-C, 5.5-7.5 s), the  
433 inter-subgroup difference was reduced and task performance was also impaired (green  
434 line in Figure 4B). In contrast, when the blockade was imposed during sample-C (3-4.5  
435 s) or early test-C period (4.5-6 s), MECIII activity was not greatly affected (Figure S3).  
436 Figure 4C summarizes the resultant task performance of the model. In three of the four  
437 conditions (blockade in sample-C, early and late test-C), results were well consistent  
438 with experimental observations (c.f., Figure 6F in (Yamamoto et al., 2014)). In addition,  
439 our model predicts that the blockade in sample-L period significantly impairs working  
440 memory performance ( $p=3.175 \times 10^{-10}$ ), suggesting that the CA1-MECV-MECIII loop  
441 circuit maintains neural activity in the MECIII and plays a pivotal role in the spatial  
442 working memory task. This prediction should be experimentally validated.

443

444 **Figure 4. Blockade of MECIII-to-CA1 connections during sample-L and late test-C**  
445 **periods.** (A) Periodicity index (Yamamoto et al., 2014) was calculated for the activity of  
446 MECIII E neurons (STAR methods). The labels L, D, C refer to sample-L, delay, test-C  
447 periods, respectively, and the numbers 1 and 2 label the early and late portions,  
448 respectively, of these periods. (B) Average differences in firing rate between the L and  
449 R subgroups of MECIII E neurons were calculated under the blockade of MECIII-to-CA1  
450 connections: normal condition (black); the blockade during sample-L periods (blue);  
451 the blockade during late test-C periods (green). In each condition, the differences were  
452 averaged over five networks and five initial states. By definition, green and black lines  
453 overlap with one another before the blockade. Boxes above the traces indicate the  
454 periods of blockade. (C)  $P_L$  (same as in Figure 1F) were calculated for different periods  
455 of the blockade.

456



457 **Figure S3 (related to Figure 4). Blockade of MECIII-to-CA1 connections during sample-**  
458 **C and test-C periods.** Connections from MECIII to CA1 were blocked during sample-C  
459 (blue) and early test-C (green) periods. Differences in firing rate between the L and R  
460 subgroups of MECIII E neurons are shown in the same manner as in Figure 4B. Similar  
461 evolutions are also shown in the normal condition (black).

462

#### 463 **Experimental validation of period-dependent preferred theta phases**

464 Our model predicts that CA1 E neurons shift their preferred theta phases from the  
465 troughs to the peaks when [ACh] is high (Figures 2B and 2E). In Figure 5A, we present  
466 the phase preference of CA1 E neurons during sample-C, sample-L, delay, early test-  
467 center (test-C1) and late test-center (test-C2) periods of the DNMP task. Their spikes  
468 preferred the troughs of theta oscillation during sample-C periods but, owing to the  
469 disinhibitory mechanism, the preferred phase was shifted to the peaks during sample-L  
470 periods (Figure 2B). When the model rat returned to the home position (delay period),  
471 [ACh] was decreased to reactivate PV neurons in CA1, which reduced the sensitivity of  
472 CA1 to inputs from MECIII and CA3 and selectively suppressed spike generation at the  
473 peaks of theta oscillation (but not at the troughs). In test-C1 periods, [ACh] was again  
474 increased to allow the activation of CAN current (Figure 3C), which shifted the  
475 preferred phase to the descending phase of theta oscillation. During test-C2 periods,  
476 our model predicts a progressive advance of preferred theta phase in CA1 due to an  
477 enhanced synaptic drive by MECIII (Figure 3B).

478

479 We confirmed these predictions in the data of a DNMP task in T-maze (Yamamoto et  
480 al., 2014). Figure 5B shows the distributions of preferred phases of spikes in rat CA1  
481 during different task periods, i.e., sample-C, sample-L (corresponding to the reward  
482 arm), delay, test-C1, and test-C2 periods (see STAR Methods). In rats, spikes were  
483 generally not modulated by theta oscillation as strongly as in the model. In particular,  
484 oscillatory modulations were weak in sample-C periods. Nonetheless, the preferred  
485 theta phases in the various task periods are well consistent between rats and models.

486 The average preferred phase is delayed during delay periods compared to other task  
487 periods in both rats and models (Figure 5C). In addition, our model predicts that the  
488 preferred phase is progressively advanced during test-C2 (i.e., late test-center) period  
489 due to an increased synaptic drive by MECIII (Figure 3B).

490

491 Next, we asked whether preferred theta phase behaves similarly in an alternating  
492 figure-eight task (Mizuseki et al., 2013). We were particularly interested in examining  
493 the hypothesized role of cholinergic control of working memory function. In the  
494 alternating figure-eight task, rats were trained to alternately change the turn direction  
495 at a junction point of an eight-shape maze, meaning that the rats had to remember the  
496 turn direction of the preceding run. This task is similar to the previous DNMP task, but  
497 one difference is that sample and test trials are not clearly separated in the alternating  
498 figure-eight task. Nevertheless, we may correlate the behavioral epochs of the two  
499 tasks to each other. When rats traverse the center arm, they had to retrieve memory of  
500 the preceding choice to prepare for the next choice. Therefore, traveling along the  
501 center arm may correspond to test-C period in the DNMP task. Then, we can define  
502 three distinct areas on the eight-shape maze (Figure 5D): early center, late center and  
503 reward arms, which may correspond to test-C1, test-C2 and sample-L periods,  
504 respectively. Below, we follow these rules.

505

506 Figure 5E shows the preferred phases of excitatory neurons in the deep layer of CA1. It  
507 has been reported that for some unknown reason these neurons only exhibit phase  
508 shifts in early trials (Fernández-Ruiz et al., 2017; Mizuseki et al., 2013). Therefore, we  
509 only used data of initial ten trials in the following analyses. On the early center arm  
510 (test-C1 period), neurons fired more frequently around the troughs of theta oscillation  
511 than the peaks. However, on the late center arm (test-C2 period), neurons fired slightly  
512 more often at the peaks, generating two peaks per theta cycle in the spike density  
513 distribution. On the reward arm (sample-L period), neurons fired most frequently at  
514 the peaks, which is consistent with the previous study (Fernández-Ruiz et al., 2017).  
515 These results seem to be consistent with the model's prediction that the preferred

516 firing phase of CA1 neurons changes from the troughs to the peaks of theta oscillation  
517 during the epochs of high [ACh]: in the alternating figure-eight task, high level of  
518 attention, or high [ACh], is likely to be required on the reward arm (for encoding  
519 reward information) and the late center arm (for recalling the previous choice).

520

521 **Figure 5. Preferred theta phases in model networks and rats.** (A) Phase preferences  
522 are shown for CA1 E neurons in model networks during given task periods (top). (B)  
523 Phase preference curves of CA1 neurons were calculated for data obtained in  
524 (Yamamoto et al., 2014). (C) Preferred theta phases of the models (filled circles) and  
525 rats (empty circles) were averaged over multiple theta cycles during given task periods.  
526 The average phase  $\bar{\theta}$  is computed as  $\bar{\theta} = \arg(\sum_k \exp(i\theta_k))$ , here,  $k$  is index of spikes  
527 for all neurons and  $i$  is imaginary unit. The same average phases are shown for two  
528 theta cycles (one in darker colors and one in light colors) for the clarity of the plots. (D)  
529 Schematic illustration of the figure-eight maze used in (Fernández-Ruiz et al., 2017;  
530 Mizuseki et al., 2013). Colored rectangles indicate early-center, late-center, and reward  
531 periods from which data were resampled. (E) Phase preference curves of CA1  
532 excitatory neurons were calculated by using the data of (Mizuseki et al., 2013). For  
533 comparison, we divided the task periods of center arm and reward arm into early and  
534 late epochs.

535

### 536 **Task performance depends on acetylcholine concentrations in the model**

537 In our model, two ACh-regulated mechanisms, that is, disinhibitory circuit in CA1 and  
538 CAN current in MECV excitatory cells, play crucial roles in encoding, maintenance and  
539 recall epochs of working memory tasks. Therefore, we examined whether these core  
540 mechanisms work robustly when [ACh] is varied. We changed the default levels of  
541 [ACh] with other parameter values unchanged. Lowering the default [ACh], which  
542 weakens disinhibition, during the encoding epoch (sample-L) disabled the CA1 L and  
543 R subgroups to exhibit large enough activity differences to encode spatial information  
544 in the CA1-MECV-MECIII loop circuit (Figure 6A, blue). Task performance was severely  
545 impaired, contrasting to intact performance at higher default [ACh] levels (Figure 6B,

546 left). Lower default [ACh] levels during delay period had almost no effects on task  
547 performance (Figure 6B, center). Finally, lower default [ACh] levels during the recall  
548 epoch (test-C2) eliminated the reactivation of the subgroup L (Figure 6A, green) and  
549 task performance was severely impaired (Figure 6B, right), but performance remained  
550 intact at higher [ACh] levels. These results show that default [ACh] levels should be  
551 sufficiently high during the encoding and recall epochs, but fine tuning of [ACh] is  
552 unnecessary.

553

554 Next, we explored whether theta-phase-locked firing has anything to do with the  
555 success of the working memory task. To this end, we compared the theta preference of  
556 CA1 neurons during the test-C2 period between successful and failure trials in both  
557 models and rats (Figure 6C). [ACh] was at the default levels. In both models and rats,  
558 neurons preferentially fired around the peaks of theta oscillation in success trials, but  
559 firing phases were somewhat delayed in failure trials.

560

561 **Figure 6. Cholinergic modulations in the network model.** (A) In CA1 (left) and MECIII  
562 (right), differences in firing rate between the subgroups L and R were calculated at the  
563 normal (black) and reduced levels of [ACh] during encoding (sample-C, blue) and recall  
564 (test-C2, green) epochs. (B) Probability of left choice averaged over different networks  
565 and initial conditions are shown at different levels of [ACh] during sample-L (left), delay  
566 (center) and test-C2 (right) periods. Thick lines indicate results for the default [ACh]  
567 levels. (C) Frequency of spikes in CA1 excitatory neurons during test-C2 periods (top)  
568 are shown in the model (left) and rats (right). In the model, [ACh] was set to the  
569 normal level and spike counts are shown separately for the subgroups L and C. Only the  
570 total spike count is shown for rats. Bottom panels show the differences in firing rate  
571 between successful and failure trials.

572

### 573 **Role of high-gamma oscillation in memory in MECIII and CA1**

574 Decision making in rats was accompanied by a rapid increase in coherent high-gamma  
575 oscillations (60 -120 Hz) between MECIII and CA1 (Yamamoto et al., 2014). However,

576 we did not model the mechanism to generate prominent gamma oscillations to keep  
577 our model mathematically simple and minimal. Actually, the simplified mathematical  
578 description was sufficient for accounting for many findings on neural activity and rat  
579 behavior reported in the experiment. Then, the question arises about the role of  
580 coherent high gamma oscillation in the working memory task. To answer this question,  
581 we applied a common oscillatory input in the high-gamma range (80 Hz) to E neurons  
582 in MECIII and CA1 (Figure 7A: also see the STAR Methods). In the experiment, high  
583 gamma oscillations of LFPs were synchronized between MECIII and the lacunosum  
584 molecule layer of CA1, to which MECIII-to-CA1 connections project, indicating a  
585 common source of high gamma oscillations projecting to both areas.

586

587 High gamma oscillation improved the decoding of memorized information from the  
588 entorhinal-hippocampal loop circuit in the model. To show this, we built a virtual  
589 decoder of excitatory and inhibitory neurons receiving inputs from MECIII and CA1  
590 (Figure 7A, see the STAR method for details). Stimulated by the high gamma input, E  
591 neurons in both areas tended to fire in the high-gamma frequency range (Figure 7B).  
592 Spike bursts were delayed in CA1 by about 10 ms from those in MECIII, which is  
593 consistent with experimental observation (Yamamoto et al., 2014). Because this delay  
594 is approximately equal to the period of high gamma oscillation, synaptic inputs from  
595 the two areas coincidentally arrived at the decoder in each high-gamma cycle. The  
596 coincident input amplified the evoked responses and facilitated spike firing of the  
597 decoder (see bursting of CA1, MECIII and decoder neurons around 7.7 sec in Figure 7B).  
598 In contrast, without the high gamma input, inputs from MECIII and CA1 did not arrive  
599 coherently to the decoder. Feedforward inhibition, which is a ubiquitously found motif  
600 of cortico-cortical synaptic connections (Isaacson and Scanziani, 2011), further  
601 attenuated the impact of incoherent spike input on decoder neurons. Thus, coherent  
602 high gamma activity in MECIII and CA1 may facilitate the readout of spatial information  
603 from MECIII by other cortical areas.

604

605 To generalize this observation, in Figure 7C, we quantified decoding performance while

606 changing burst size (the number of spikes per burst) in MECIII and CA1. The  
607 performance was measured by the probability that coincident bursts in CA1 and MECIII  
608 generate a spike burst in a decoder neuron. Without gamma oscillation, even a large  
609 burst in MECIII and/or CA1 could not evoke a burst in the decoder. In contrast, in the  
610 presence of gamma oscillation a small burst in MECIII and/or CA1 was sufficient for  
611 evoking a burst in the decoder with high fidelity. These results further support the role  
612 of coherent high gamma oscillation in facilitating the decoding performance. It is noted  
613 that an increased high gamma coherence between CA1 and MECIII enhanced the  
614 performance even if the input burst size was reduced.

615

616 **Figure 7. Role of high-gamma oscillation in information decoding.** (A) Decoding of  
617 choice information from MECIII and CA1 is schematically illustrated. (B) Raster plots are  
618 shown for CA1 and MECIII E neurons in the subgroup L and excitatory and inhibitory  
619 neurons in the decoder. From 7.5 [s] to 8 [s], a common coherent high-gamma input  
620 was applied to MECIII E and CA1 E neurons. (C) Decoding performance (upper) and the  
621 average number of output spikes evoked from a decoder neuron by a single burst in  
622 MECIII (left), CA1 (middle) or both (right) are plotted against the input burst size  
623 (bottom). Spike counts obtained with (blue) and without (red) the high-gamma  
624 oscillatory input are displayed. The decoding performance was defined as the  
625 probability that the number of output spikes in a burst exceeds a threshold value  
626 (dotted lines in bottom panels) for a given input burst size.

627

628

## 629 **Discussion**

630

631 In this study, we developed a model comprising MECV, MECIII and CA1 to explore how  
632 these local circuits process and communicate information with each other during  
633 DNMP tasks. Our model indicates that ACh concentration is modulated in a task-period  
634 dependent manner to coordinate local network computation for encoding,  
635 maintenance and recalling spatial information across the multiple cortical areas. With

636 these modulations, our model successfully replicates the various features of neural  
637 activity observed in MECIII and CA1 (Yamamoto et al., 2014). In particular, the model  
638 predicts that CA1 neurons change their preferred theta phases depending on cognitive  
639 demands, which was also supported by experimental data (Fernández-Ruiz et al., 2017;  
640 Mizuseki et al., 2013; Yamamoto et al., 2014).

641

#### 642 **Relevance of MEC-CA1 loop to spatial working memory tasks**

643 The hippocampal area CA1 is a central locus for spatial information processing, and  
644 stores the concurrent position of the rat (O'Keefe and Dostrovsky, 1971) as well as  
645 retrospective and prospective representations of position information (Dragoi and  
646 Buzsáki, 2006; Ferbinteanu and Shapiro, 2003; Foster and Wilson, 2006; Gupta et al.,  
647 2010; Pastalkova et al., 2008; Zheng et al., 2016). Based on the hypothesis that the  
648 CA1-MECV-MECIII loop circuit is involved in spatial working memory (van Strien et al.,  
649 2009; Witter et al., 2000), we demonstrated how the spatial information of the  
650 selected arm is encoded in CA1 during a sample trial (Figure 2), maintained in MECV  
651 during delay period, and transferred to MECIII and reloaded on CA1 for decision  
652 making (Figure 3). Consistent with the hypothesis, connections from MECIII to CA1 are  
653 crucial for the success of spatial working memory tasks (Suh et al., 2011; Yamamoto et  
654 al., 2014). Our model demonstrated this role of MECIII-to-CA1 connections in spatial  
655 working memory, predicting their crucial contribution to memory encoding (Figure S3).  
656 This prediction can be tested experimentally.

657

658 Sequence of spikes with theta phase precession, that is, “theta sequence” (Ferbinteanu  
659 and Shapiro, 2003; Middleton and McHugh, 2016; Pfeiffer and Foster, 2013; Schlesiger  
660 et al., 2015; Zheng et al., 2016), has been observed in the hippocampus and the MEC  
661 during cognitive tasks requiring episodic memory. The blockade of MECIII-to-CA1  
662 connections causes modulation of theta activity in MECIII (Suh et al., 2011; Yamamoto  
663 et al., 2014). Similarly, inactivation of the MEC disrupts the temporal organization of  
664 spikes and impairs information maintenance (Robinson et al., 2017). These results  
665 imply that the temporal coordination of theta-phase-locked neuronal firing along the

666 CA1-MECV-MECIII loop circuit is crucial for the success of spatial working memory  
667 tasks. We showed an example case in which the disruption of this temporal  
668 coordination in MECIII led to a significant increase of failure trials (Figure S1B, C).

669

670 Our model hypothesizes that [ACh] changes in time during a working memory task,  
671 which generates shifts of preferred theta phase in CA1 E neurons: higher [ACh]  
672 advances the preferred phase towards the peak of theta oscillation (Figure 5). Based on  
673 this hypothesis, the model predicts that phase advances occur during the encoding  
674 epoch in sample trials (i.e., on the reward arm) and during the recall epoch in test trials  
675 (i.e., on the center arm). We validated this prediction with the results of two  
676 experiments (Fernández-Ruiz et al., 2017; Mizuseki et al., 2013; Yamamoto et al.,  
677 2014). Phase advances in the encoding epoch have been known previously and can be  
678 accounted for by temporal separation between CA3 input and MECIII input to CA1  
679 (Colgin et al., 2009; Cutsuridis et al., 2010; Hasselmo et al., 2002; Lasztóczy and  
680 Klausberger, 2016; Milstein et al., 2015)(Mizuseki et al., 2009). Input from CA3  
681 preferentially arrives at CA1 on the descending phase of theta oscillation of LFP  
682 (Klausberger and Somogyi, 2008) (Mizuseki et al., 2009)whereas input from MECIII  
683 arrives at the peaks of theta oscillation (Colgin et al., 2009; Fernández-Ruiz et al., 2017;  
684 Hasselmo et al., 2002) (Mizuseki et al., 2009). Because MECIII input, which presumably  
685 carries sensory information, seems to dominate CA3 input during encoding  
686 (Hasselmo2002), CA1 neurons likely fire at the peaks rather than the troughs of theta  
687 oscillation (Fernández-Ruiz et al., 2017).

688

689 Phase advances on the later central arm (i.e., in the recall epoch) represent a novel  
690 finding of this study. CA1 neurons were previously shown to fire at the troughs of theta  
691 oscillation during memory recall (Fernández-Ruiz et al., 2017), and this was consistent  
692 with the view that CA3 input dominates MECIII input during this epoch. Challenging the  
693 conventional view, our model predicts that CA1 neurons retrieve spatial memory from  
694 the MECIII, hence firing at the peaks of theta oscillation. Possibly consistent with this  
695 prediction, if we divide the center arm into early and late portions in (Mizuseki et al.,



696 2009), preferred theta phases show a second (and advanced) peak in the late portion  
697 of recall epoch (Figure 5D). This peak was absent in the previous analysis (Fernández-  
698 Ruiz et al., 2017) because the center arm was treated as a single entity. The consistency  
699 between the model and experiment requires further clarification.

700

### 701 **Reflection of cognitive demands on the MEC-CA1 loop circuit through ACh**

702 ACh is involved with several cognitive functions such as sensory discrimination (Hangya  
703 et al., 2015; Pinto et al., 2013), associative learning (Sabec et al., 2018), and spatial  
704 (Croxson et al., 2011; Okada et al., 2015) and non-spatial working memory (Furey et al.,  
705 2000; Hasselmo and Stern, 2006; McGaughy et al., 2005). In correlation with cognitive  
706 states, ACh concentration changes to modulate activity of the specific types of neurons  
707 (Muñoz et al., 2017; Womelsdorf et al., 2014) through muscarinic and nicotinic  
708 receptors (Parikh et al., 2007; Teles-Grilo Ruivo et al., 2017; Zhang et al., 2010). In  
709 associative learning, ACh was suggested to facilitate MECIII-to-CA1 input during the  
710 encoding epoch and CA3-to-CA1 input during the decoding epoch (Hasselmo, 2006).  
711 We propose a novel role and mechanism of ACh for the functions of the entorhinal-  
712 hippocampal loop circuit according to the cognitive demands arising during a spatial  
713 working memory task, namely, memory encoding, maintenance and recall. Consistent  
714 with the proposal of our model (Figure 1D), it has recently been shown in a DNMP task  
715 (Teles-Grilo Ruivo et al., 2017) that [ACh] is significantly higher on the reward arm than  
716 in other positions in both sample and test trials, that on the center arm [ACh] tends to  
717 be larger in test trials than in sample trials, and that [ACh] is low in delay periods (c.f.,  
718 Figure 6B).

719

720 We assumed that a change in cognitive demands is reflected in a phasic change in  
721 [ACh] on the timescale of seconds. However, [ACh] is thought to change in a diffusive  
722 and tonic manner on much slower timescales of minutes or hours. Importantly, recent  
723 studies have revealed that [ACh] undergoes phasic changes at sub-second and second  
724 timescales (Parikh et al., 2007; Teles-Grilo Ruivo et al., 2017; Zhang et al., 2010), and  
725 such a phasic change in [ACh] is associated with reward or aversive signals (Hangya et

726 al., 2015). Further, task performance is correlated with slower tonic increases in [ACh]  
727 during the task period (Parikh et al., 2007), but uncorrelated with phasic changes in  
728 [ACh] in the reward arm (Teles-Grilo Ruivo et al., 2017). In our model, task performance  
729 saturates above a certain level of [ACh] in the reward arm (Left panel in Figure 6B). Our  
730 results suggest that the tonic level of [ACh] expresses an overall bias during each trial  
731 and a phasic increase in [ACh] gives a more elaborate modulation reflecting a specific  
732 cognitive demand.

733

### 734 **Dynamic processing across multiple areas**

735 Coherence in neural activity between different cortical areas varies with the cognitive  
736 state of the brain (Benchenane et al., 2010; Fries, 2015). Furthermore, disruption of a  
737 cortico-cortical interaction at different behavioral states can impair task performance  
738 differently (Spellman et al., 2015; Yamamoto et al., 2014). These results imply that  
739 information flows between cortical areas are differentially routed according to the  
740 demand of the on-going cognitive process through the dynamical regulation of  
741 corticocortical coherence. Theoretical studies have proposed several mechanisms of  
742 information routing based on a balance control between excitatory and inhibitory  
743 synaptic inputs (Vogels and Abbott, 2009), disinhibitory circuits (Yang et al., 2016),  
744 spontaneous bursts (Palmigiano et al., 2017), and band-pass filtering by a feed-forward  
745 inhibitory circuit (Akam and Kullmann, 2010). While these studies focused on the  
746 circuit mechanisms of information routing, we addressed how such mechanisms are  
747 integrated to perform a spatial working memory task through different cognitive  
748 demands (Benchenane et al., 2010; Spellman et al., 2015; Yamamoto et al., 2014). We  
749 demonstrated that cholinergic inputs coordinate the encoding and recall functions by  
750 modulating the cortical disinhibitory circuit and  $\text{Ca}^{2+}$ -dependent cationic channels in  
751 excitatory cells.

752

753 Accumulating evidence suggests that disinhibitory circuits play a crucial role in  
754 cognitive tasks such as fear conditioning (Letzkus et al., 2011; Pi et al., 2013) and  
755 sensory discrimination (Hangya et al., 2015; Pinto et al., 2013). VIP, SOM and PV

756 inhibitory neurons are dominant interneuron types of the disinhibitory circuit (Donato  
757 et al., 2013; Francavilla et al., 2018; Kamigaki and Dan, 2017; Zhang et al., 2014) VIP  
758 neurons express muscarinic receptors and are depolarized by cholinergic input (Bell et  
759 al., 2014). VIP neurons project more strongly to SOM neurons than to PV neurons in  
760 cortical areas (Kamigaki and Dan, 2017; Zhang et al., 2014), but some studies have  
761 shown stronger modulations of PV neurons in the hippocampus (Donato et al., 2013;  
762 Francavilla et al., 2018). PV neurons innervating the perisomatic area of CA1 excitatory  
763 neurons preferably spike in the descending phase of theta oscillation (Klausberger and  
764 Somogyi, 2008) to weaken CA3 input. In contrast, SOM (OLM in CA1) neurons  
765 projecting the distal dendrites of CA1 excitatory neurons preferably spike at the  
766 troughs of theta oscillation (Klausberger and Somogyi, 2008)(Royer et al. Buzsakai, 2012  
767 Nature Neuroscience) to weaken MECIII input. Because MECIII input rarely arrive at the  
768 troughs of theta oscillation, the suppression of MECIII input by disinhibited OLM  
769 neurons exerts a smaller effect on excitatory neuron firing compared to disinhibited PV  
770 neurons. Therefore, we mainly focused on the effect of PV neurons on neural circuit  
771 functions. In line with our model's prediction (Figure S2), optogenetic inhibition of PV  
772 neurons impairs performance in spatial working memory (Murray et al., 2011).  
773 However, the actual spikes delivered by the MECIII are distributed broadly over a theta  
774 cycle in rats (Mizuseki et al., 2009), implying that disinhibition of PV and SOM neurons  
775 can modulate activity of excitatory neurons in parallel. Indeed, our model predicts that  
776 inactivation of PV or VIP neurons impairs task performance in different ways (Figure  
777 S2). This prediction can be examined by a selective inhibition of either neuron types in  
778 the spatial working memory task.

779

#### 780 **Covert memory state for maintenance of information**

781 Recent studies showed that dynamically evolving neuronal activity can maintain  
782 information during a delay period in working memory tasks (Murray et al., 2017;  
783 Stokes, 2015; Wolff et al., 2017)(Pastalkova et al., 2008). In the DNMP task we studied  
784 (Yamamoto et al., 2014), theta phase-locked firing of MECIII neurons was correlated  
785 with the success of the task. Nevertheless, this neuronal activity temporarily vanished

786 during a delay period, implying that a non-spiking activity maintains information on the  
787 previous choice. We hypothesized that the conductance of a specific ionic channel, i.e.,  
788 calcium-dependent cationic current, remains in an elevated state to preserve spatial  
789 information during delay period. This elevated state is not accompanied by neuronal  
790 firing, hence is consistent with experimental observations. This mechanism was  
791 originally proposed to account for persistent activity of isolated single neurons  
792 (Fransen et al., 2002; Fransén et al., 2006) and suggested to be engaged in temporal  
793 association memory (Kitamura et al., 2014). Our model demonstrates that the same  
794 mechanism can generate a covert memory state necessary in spatial working memory.  
795 This and other mechanisms of covert memory state, for instance, short-term synaptic  
796 plasticity (Mongillo et al., 2008), are not mutually exclusive. However, our mechanism  
797 has an important advantage that working memory maintenance is turned on and off  
798 by cholinergic modulation depending on the cognitive demand. Thus, our results  
799 suggest that neuromodulators are crucial for the flexible control of memory processing  
800 by the brain.

801

### 802 **Limitation of the model**

803 We showed that coherent activations of CA1 and MECIII at high-gamma frequencies  
804 facilitate decoding of information about the previous choice from CA1 and MECIII  
805 (Figure 7). However, gamma oscillation is not absolutely necessary in our model for  
806 performing spatial working memory tasks. Theta-phase-locked neuronal firing alone  
807 could sufficiently facilitate information transfer along the MECIII-CA1-MECV loop circuit  
808 without gamma oscillation. This result may somewhat contradict the experimentally  
809 suggested role of gamma oscillation in information transfer between the hippocampus  
810 and entorhinal cortex (Colgin et al., 2009; Yamamoto et al., 2014). The role of gamma  
811 oscillation needs to be further explored.

812

813 Secondly, we did not model any mechanism to translate the decoded information into  
814 a correct choice behavior under a given rule of decision making (e.g., the alternate  
815 choice of left or right turn). The mPFC is projected to by CA1 and projects back to it via

816 reuniens (Dolleman-Van Der Weel and Witter, 1996; Ito et al., 2015), and is engaged in  
817 spatial working memory (Bolkan et al., 2017; Jones and Wilson, 2005; Spellman et al.,  
818 2015). Furthermore, some mPFC neurons exhibit rule-related activities. However, the  
819 delay-period activity of mPFC neurons is specific to neither previous nor present  
820 location in a DNMP task (Bolkan2017) and the rule-related activities are not location-  
821 specific (Durstewitz et al., 2010; Guise and Shapiro, 2017; Preston and Eichenbaum,  
822 2013). Where and how decision rules are processed and how spatial working memory  
823 and rule-related activities are integrated are open to future studies.

824

## 825 **References**

- 826 Akam, T.E., and Kullmann, D.M. (2010). Oscillations and Filtering Networks Support  
827 Flexible Routing of Information. *Neuron* 67, 308–320.
- 828 Albuquerque, E.X., Pereira, E.F.R., Alkondon, M., and Rogers, S.W. (2009). Mammalian  
829 Nicotinic Acetylcholine Receptors: From Structure to Function. *Physiol. Rev.* 89, 73–  
830 120.
- 831 Bell, L.A., Bell, K. a, and McQuiston, a R. (2014). Activation of muscarinic receptors by  
832 ACh release in hippocampal CA1 depolarizes VIP but has varying effects on  
833 parvalbumin-expressing basket cells. *J. Physiol.* 1, 197–215.
- 834 Benchenane, K., Peyrache, A., Khamassi, M., Tierney, P.L., Gioanni, Y., Battaglia, F.P.,  
835 and Wiener, S.I. (2010). Coherent Theta Oscillations and Reorganization of Spike  
836 Timing in the Hippocampal- Prefrontal Network upon Learning. *Neuron* 66, 921–936.
- 837 Bittner, K.C., Grienberger, C., Vaidya, S.P., Milstein, A.D., Macklin, J.J., Suh, J.,  
838 Tonegawa, S., and Magee, J.C. (2015). Conjunctive input processing drives feature  
839 selectivity in hippocampal CA1 neurons. *Nat. Neurosci.* 18, 1–13.
- 840 Bolkan, S.S., Stujenske, J.M., Parnaudeau, S., Spellman, T.J., Rauffenbart, C., Abbas,  
841 A.I., Harris, A.Z., Gordon, J.A., and Kellendonk, C. (2017). Thalamic projections sustain  
842 prefrontal activity during working memory maintenance. *Nat. Neurosci.* 20, 987–996.
- 843 Borhegyi, Z. (2004). Phase Segregation of Medial Septal GABAergic Neurons during  
844 Hippocampal Theta Activity. *J. Neurosci.* 24, 8470–8479.
- 845 Buehlmann, A., and Deco, G. (2010). Optimal Information Transfer in the Cortex

846 through Synchronization. *PLoS Comput. Biol.* *6*, e1000934.

847 Colgin, L.L., Denninger, T., Fyhn, M., Hafting, T., Bonnevie, T., Jensen, O., Moser, M.-B.,  
848 and Moser, E.I. (2009). Frequency of gamma oscillations routes flow of information in  
849 the hippocampus. *Nature* *462*, 353–357.

850 Crosson, P.L., Kyriazis, D.A., and Baxter, M.G. (2011). Cholinergic modulation of a  
851 specific memory function of prefrontal cortex. *Nat. Neurosci.* *14*, 1510–1512.

852 Cutsuridis, V., Cobb, S., and Graham, B.P. (2010). Encoding and retrieval in a model of  
853 the hippocampal CA1 microcircuit. *Hippocampus* *20*, 423–446.

854 Dolleman-Van Der Weel, M., and Witter, M.P. (1996). Projections From the Nucleus  
855 Reuniens Thalami to the Entorhinal Cortex , Hippocampal Field CA1 , and the  
856 Subiculum in the Rat Arise From Different Populations of Neurons. *J. Comp. Neurol.*  
857 *364*, 637–650.

858 Donato, F., Rompani, S.B., and Caroni, P. (2013). Parvalbumin-expressing basket-cell  
859 network plasticity induced by experience regulates adult learning. *Nature* *504*, 272–  
860 276.

861 Dragoi, G., and Buzsáki, G. (2006). Temporal encoding of place sequences by  
862 hippocampal cell assemblies. *Neuron* *50*, 145–157.

863 Durstewitz, D., Vitoz, N.M., Floresco, S.B., and Seamans, J.K. (2010). Abrupt transitions  
864 between prefrontal neural ensemble states accompany behavioral transitions during  
865 rule learning. *Neuron* *66*, 438–448.

866 Eichenbaum, H. (2017). Prefrontal – hippocampal interactions in episodic memory.  
867 *Nat. Publ. Gr.* *18*, 547–558.

868 Ferbinteanu, J., and Shapiro, M.L. (2003). Prospective and Retrospective Memory  
869 Coding in the Hippocampus. *Neuron* *40*, 1227–1239.

870 Fernández-Ruiz, A., Oliva, A., Nagy, G.A., Maurer, A.P., Berényi, A., and Buzsáki, G.  
871 (2017). Entorhinal-CA3 Dual-Input Control of Spike Timing in the Hippocampus by  
872 Theta-Gamma Coupling. *Neuron* *93*, 1213–1226.e5.

873 Foster, D.J., and Wilson, M.A. (2006). Reverse replay of behavioural sequences in  
874 hippocampal place cells during the awake state. *Nature* *440*, 680–683.

875 Francavilla, R., Villette, V., Luo, X., Chamberland, S., Muñoz-Pino, E., Camiré, O.,

- 876 Wagner, K., Kis, V., Somogyi, P., and Topolnik, L. (2018). Connectivity and network  
877 state-dependent recruitment of long-range VIP-GABAergic neurons in the mouse  
878 hippocampus. *Nat. Commun.* *9*, 5043.
- 879 Fransen, E., Alonso, A.A., and Hasselmo, M.E. (2002). Simulations of the role of the  
880 muscarinic-activated calcium-sensitive nonspecific cation current INCM in entorhinal  
881 neuronal activity during delayed matching tasks. *J. Neurosci.* *22*, 1081–1097.
- 882 Fransén, E., Tahvildari, B., Egorov, A. V, Hasselmo, M.E., and Alonso, A. a (2006).  
883 Mechanism of graded persistent cellular activity of entorhinal cortex layer v neurons.  
884 *Neuron* *49*, 735–746.
- 885 Fries, P. (2015). Rhythms for Cognition: Communication through Coherence. *Neuron*  
886 *88*, 220–235.
- 887 Furey, M.L., Pietrini, P., and Haxby, J. V (2000). Cholinergic enhancement and increased  
888 selectivity of perceptual processing during working memory. *Science* *290*, 2315–2319.
- 889 Gonzalez-Sulser, A., Parthier, D., Candela, A., McClure, C., Pastoll, H., Garden, D.,  
890 Surmeli, G., and Nolan, M.F. (2014). GABAergic Projections from the Medial Septum  
891 Selectively Inhibit Interneurons in the Medial Entorhinal Cortex. *J. Neurosci.* *34*,  
892 16739–16743.
- 893 Guise, K.G., and Shapiro, M.L. (2017). Medial Prefrontal Cortex Reduces Memory  
894 Interference by Modifying Hippocampal Encoding. *Neuron* *94*, 183–192.e8.
- 895 Gupta, A.S., van der Meer, M.A.A., Touretzky, D.S., and Redish, A.D. (2010).  
896 Hippocampal Replay Is Not a Simple Function of Experience. *Neuron* *65*, 695–705.
- 897 Hangya, B., Ranade, S.P., Lorenc, M., and Kepecs, A. (2015). Central Cholinergic  
898 Neurons Are Rapidly Recruited by Reinforcement Feedback. *Cell* *162*, 1155–1168.
- 899 Hasselmo, M.E. (2006). The role of Acetylcholine in learning and memory. *Curr. Opin.*  
900 *Neurobiol.* *16*.
- 901 Hasselmo, M.E., and Sarter, M. (2010). Modes and Models of Forebrain Cholinergic  
902 Neuromodulation of Cognition. *Neuropsychopharmacology* *36*, 52–73.
- 903 Hasselmo, M.E., and Stern, C.E. (2006). Mechanisms underlying working memory for  
904 novel information. *Trends Cogn. Sci.* *10*, 487–493.
- 905 Hasselmo, M.E., Bodelón, C., and Wyble, B.P. (2002). A proposed function for

906 hippocampal theta rhythm: separate phases of encoding and retrieval enhance  
907 reversal of prior learning. *Neural Comput.* *14*, 793–817.

908 Isaacson, J.S., and Scanziani, M. (2011). How inhibition shapes cortical activity. *Neuron*  
909 *72*, 231–243.

910 Ito, H.T., Zhang, S., Witter, M.P., Moser, E.I., and Moser, M. (2015). A prefrontal–  
911 thalamo–hippocampal circuit for goal-directed spatial navigation. *Nature* *522*, 50–55.

912 Jones, M.W., and Wilson, M.A. (2005). Theta Rhythms Coordinate Hippocampal–  
913 Prefrontal Interactions in a Spatial Memory Task. *PLoS Biol.* *3*, e402.

914 Kamigaki, T., and Dan, Y. (2017). Delay activity of specific prefrontal interneuron  
915 subtypes modulates memory-guided behavior. *Nat. Neurosci.* *20*, 854–863.

916 Kitamura, T., Pignatelli, M., Suh, J., Kohara, K., Yoshiki, A., Abe, K., and Tonegawa, S.  
917 (2014). Island Cells Control Temporal Association Memory. *Science* (80-. ). *343*, 896–  
918 901.

919 Klausberger, T., and Somogyi, P. (2008). Neuronal diversity and temporal dynamics:  
920 the unity of hippocampal circuit operations. *Science* *321*, 53–57.

921 Lasztóczy, B., and Klausberger, T. (2016). Hippocampal Place Cells Couple to Three  
922 Different Gamma Oscillations during Place Field Traversal. *Neuron* *91*, 34–40.

923 Letzkus, J.J., Wolff, S.B.E., Meyer, E.M.M., Tovote, P., Courtin, J., Herry, C., and Lüthi, A.  
924 (2011). A disinhibitory microcircuit for associative fear learning in the auditory cortex.  
925 *Nature* *480*, 331–335.

926 Letzkus, J.J., Wolff, S.B.E., and Lüthi, A. (2015). Disinhibition, a Circuit Mechanism for  
927 Associative Learning and Memory. *Neuron* *88*, 264–276.

928 Masamizu, Y., Tanaka, Y.R., Tanaka, Y.H., Hira, R., Ohkubo, F., Kitamura, K., Isomura, Y.,  
929 Okada, T., and Matsuzaki, M. (2014). Two distinct layer-specific dynamics of cortical  
930 ensembles during learning of a motor task. *Nat. Neurosci.* *17*, 987–994.

931 McGaughy, J., Koene, R.A., Eichenbaum, H., and Hasselmo, M.E. (2005). Cholinergic  
932 Deafferentation of the Entorhinal Cortex in Rats Impairs Encoding of Novel But Not  
933 Familiar Stimuli in a Delayed Nonmatch-to-Sample Task. *J. Neurosci.* *25*, 10273–10281.

934 Middleton, S.J., and McHugh, T.J. (2016). Silencing CA3 disrupts temporal coding in the  
935 CA1 ensemble. *Nat. Neurosci.* *19*, 945–951.



936 Middleton, S., Jalics, J., Kispersky, T., Lebeau, F.E.N., Roopun, A.K., Kopell, N.J.,  
937 Whittington, M.A., and Cunningham, M.O. (2008). NMDA receptor-dependent  
938 switching between different gamma rhythm-generating microcircuits in entorhinal  
939 cortex. *Proc. Natl. Acad. Sci. U. S. A.* *105*, 18572–18577.

940 Milstein, A.D., Bloss, E.B., Apostolides, P.F., Vaidya, S.P., Dilly, G.A., Zemelman, B. V,  
941 and Magee, J.C. (2015). Inhibitory Gating of Input Comparison in the CA1 Microcircuit.  
942 *Neuron* *87*, 1274–1289.

943 Mizuseki, K., Sirota, A., Pastalkova, E., and Buzsáki, G. (2009). Theta Oscillations  
944 Provide Temporal Windows for Local Circuit Computation in the Entorhinal-  
945 Hippocampal Loop. *Neuron* *64*, 267–280.

946 Mizuseki, K., Sirota, A., Pastalkova, E., Diba, K., and Buzsaki, G. (2013). Multiple single  
947 unit recordings from different rat hippocampal and entorhinal regions while the  
948 animals were performing multiple behavioral tasks.

949 Mongillo, G., Barak, O., and Tsodyks, M. (2008). Synaptic theory of working memory.  
950 *Science* *319*, 1543–1546.

951 Muñoz, W., Tremblay, R., Levenstein, D., and Rudy, B. (2017). Layer-specific  
952 modulation of neocortical dendritic inhibition during active wakefulness. *Science* (80-  
953 .). *355*, 954–959.

954 Murray, A.J., Sauer, J.-F., Riedel, G., McClure, C., Ansel, L., Cheyne, L., Bartos, M.,  
955 Wisden, W., and Wulff, P. (2011). Parvalbumin-positive CA1 interneurons are required  
956 for spatial working but not for reference memory. *Nat. Neurosci.* *14*, 297–299.

957 Murray, J.D., Bernacchia, A., Roy, N.A., Constantinidis, C., Romo, R., and Wang, X.-J.  
958 (2017). Stable population coding for working memory coexists with heterogeneous  
959 neural dynamics in prefrontal cortex. *Proc. Natl. Acad. Sci.* *114*, 394–399.

960 Newman, E.L., Gupta, K., Climer, J.R., Monaghan, C.K., and Hasselmo, M.E. (2012).  
961 Cholinergic modulation of cognitive processing: insights drawn from computational  
962 models. *Front. Behav. Neurosci.* *6*, 1–19.

963 O’Keefe, J., and Dostrovsky, J. (1971). The hippocampus as a spatial map. Preliminary  
964 evidence from unit activity in the freely-moving rat. *Brain Res.* *34*, 171–175.

965 Okada, K., Nishizawa, K., Kobayashi, T., Sakata, S., and Kobayashi, K. (2015). Distinct

966 roles of basal forebrain cholinergic neurons in spatial and object recognition memory.  
967 *Sci. Rep.* *5*, 13158.

968 Palmigiano, A., Geisel, T., Wolf, F., and Battaglia, D. (2017). Flexible information  
969 routing by transient synchrony. *Nat. Neurosci.* *20*, 1014–1022.

970 Parikh, V., Kozak, R., Martinez, V., and Sarter, M. (2007). Prefrontal Acetylcholine  
971 Release Controls Cue Detection on Multiple Timescales. *Neuron* *56*, 141–154.

972 Pastalkova, E., Itskov, V., Amarasingham, A., and Buzsaki, G. (2008). Internally  
973 Generated Cell Assembly Sequences in the Rat Hippocampus. *Science* (80-. ). *321*,  
974 1322–1327.

975 Pfeiffer, B.E., and Foster, D.J. (2013). Hippocampal place-cell sequences depict future  
976 paths to remembered goals. *Nature* *497*, 74–79.

977 Pi, H.-J., Hangya, B., Kvitsiani, D., Sanders, J.I., Huang, Z.J., and Kepecs, A. (2013).  
978 Cortical interneurons that specialize in disinhibitory control. *Nature* *503*, 521–524.

979 Pinto, L., Goard, M.J., Estandian, D., Xu, M., Kwan, A.C., Lee, S., Harrison, T.C., Feng, G.,  
980 and Dan, Y. (2013). Fast modulation of visual perception by basal forebrain cholinergic  
981 neurons. *Nat. Publ. Gr.* *16*, 1857–1863.

982 Preston, A.R., and Eichenbaum, H. (2013). Interplay of hippocampus and prefrontal  
983 cortex in memory. *Curr. Biol.* *23*, 764–773.

984 Rahman, J., and Berger, T. (2011). Persistent activity in layer 5 pyramidal neurons  
985 following cholinergic activation of mouse primary cortices. *Eur. J. Neurosci.* *34*, 22–30.

986 Robinson, N.T.M., Priestley, J.B., Rueckemann, J.W., Garcia, A.D., Smeglin, V.A.,  
987 Marino, F.A., and Eichenbaum, H. (2017). Medial Entorhinal Cortex Selectively  
988 Supports Temporal Coding by Hippocampal Neurons. *Neuron* *94*, 677–688.e6.

989 Rotstein, H.G., Oppermann, T., White, J.A., and Kopell, N.J. (2006). The dynamic  
990 structure underlying subthreshold oscillatory activity and the onset of spikes in a  
991 model of medial entorhinal cortex stellate cells. *J. Comput. Neurosci.* *21*, 271–292.

992 Sabec, M.H., Wonnacott, S., Warburton, E.C., and Bashir, Z.I. (2018). Nicotinic  
993 Acetylcholine Receptors Control Encoding and Retrieval of Associative Recognition  
994 Memory through Plasticity in the Medial Prefrontal Cortex. *Cell Rep.* *22*, 3409–3415.

995 Schlesiger, M.I., Cannova, C.C., Boubilil, B.L., Hales, J.B., Mankin, E.A., Brandon, M.P.,

996 Leutgeb, J.K., Leibold, C., and Leutgeb, S. (2015). The medial entorhinal cortex is  
997 necessary for temporal organization of hippocampal neuronal activity. *Nat. Neurosci.*  
998 *18*.

999 Spellman, T., Rigotti, M., Ahmari, S.E., Fusi, S., Gogos, J.A., and Gordon, J.A. (2015).  
1000 Hippocampal–prefrontal input supports spatial encoding in working memory. *Nature*  
1001 *522*, 309–314.

1002 Stokes, M.G. (2015). ‘Activity-silent’ working memory in prefrontal cortex: a dynamic  
1003 coding framework. *Trends Cogn. Sci.* *19*, 394–405.

1004 van Strien, N.M., Cappaert, N.L.M., and Witter, M.P. (2009). The anatomy of memory:  
1005 an interactive overview of the parahippocampal–hippocampal network. *Nat. Rev.*  
1006 *Neurosci.* *10*, 272–282.

1007 Suh, J., Rivest, A.J., Nakashiba, T., Tominaga, T., and Tonegawa, S. (2011). Entorhinal  
1008 Cortex Layer III Input to the Hippocampus Is Crucial for Temporal Association Memory.  
1009 *Science* (80-. ). *334*, 1415–1420.

1010 Swanson, L.W., and Cowan, W.M. (1977). An Autoradiographic Study of the  
1011 Organization of the Efferent Connections of the Hippocampal Formation in the Rat. *J.*  
1012 *Comp. Neurol.* *172*, 49–84.

1013 Takahashi, H., and Magee, J.C. (2009). Pathway Interactions and Synaptic Plasticity in  
1014 the Dendritic Tuft Regions of CA1 Pyramidal Neurons. *Neuron* *62*, 102–111.

1015 Teles-Gribo Ruivo, L.M., Baker, K.L., Conway, M.W., Kinsley, P.J., Gilmour, G., Phillips,  
1016 K.G., Isaac, J.T.R., Lowry, J.P., and Mellor, J.R. (2017). Coordinated Acetylcholine  
1017 Release in Prefrontal Cortex and Hippocampus Is Associated with Arousal and Reward  
1018 on Distinct Timescales. *Cell Rep.* *18*, 905–917.

1019 Unal, G., Joshi, A., Viney, T.J., Kis, V., and Somogyi, P. (2015). Synaptic Targets of  
1020 Medial Septal Projections in the Hippocampus and Extrahippocampal Cortices of the  
1021 Mouse. *J. Neurosci.* *35*, 15812–15826.

1022 Vogels, T.P., and Abbott, L.F. (2005). Signal propagation and logic gating in networks of  
1023 integrate-and-fire neurons. *J. Neurosci.* *25*, 10786–10795.

1024 Vogels, T.P., and Abbott, L.F. (2009). Gating multiple signals through detailed balance  
1025 of excitation and inhibition in spiking networks. *Nat. Neurosci.* *12*, 483–491.

1026 Wang, X.-J., and Buzsáki, G. (1996). Gamma oscillation by synaptic inhibition in a  
1027 hippocampal interneuronal network model. *J. Neurosci.* *16*, 6402–6413.

1028 Witter, M.P., Wouterlood, F.G., Naber, P.A., and Van Haeften, T. (2000). Anatomical  
1029 organization of the parahippocampal-hippocampal network. *Ann. N. Y. Acad. Sci.* *911*,  
1030 1–24.

1031 Wolff, M.J., Jochim, J., Akyürek, E.G., and Stokes, M.G. (2017). Dynamic hidden states  
1032 underlying working-memory-guided behavior. *Nat. Neurosci.*

1033 Womelsdorf, T., Valiante, T. a, Sahin, N.T., Miller, K.J., and Tiesinga, P.H. (2014).  
1034 Dynamic circuit motifs underlying rhythmic gain control, gating and integration. *Nat.*  
1035 *Neurosci.* *17*, 1031–1039.

1036 Wulff, P., Ponomarenko, A. a, Bartos, M., Korotkova, T.M., Fuchs, E.C., Bähner, F.,  
1037 Both, M., Tort, A.B.L., Kopell, N.J., Wisden, W., et al. (2009). Hippocampal theta rhythm  
1038 and its coupling with gamma oscillations require fast inhibition onto parvalbumin-  
1039 positive interneurons. *Proc. Natl. Acad. Sci. U. S. A.* *106*, 3561–3566.

1040 Yamamoto, J., Suh, J., Takeuchi, D., and Tonegawa, S. (2014). Successful Execution of  
1041 Working Memory Linked to Synchronized High-Frequency Gamma Oscillations. *Cell*  
1042 *157*, 845–857.

1043 Yang, G.R., Murray, J.D., and Wang, X. (2016). A dendritic disinhibitory circuit  
1044 mechanism for pathway-specific gating. *Nat. Commun.* *7*, 12815.

1045 Zhang, H., Lin, S.-C., and Nicolelis, M. a L. (2010). Spatiotemporal coupling between  
1046 hippocampal acetylcholine release and theta oscillations in vivo. *J. Neurosci.* *30*,  
1047 13431–13440.

1048 Zhang, S., Xu, M., Kamigaki, T., Hoang Do, J.P., Chang, W.-C., Jenvay, S., Miyamichi, K.,  
1049 Luo, L., and Dan, Y. (2014). Long-range and local circuits for top-down modulation of  
1050 visual cortex processing. *Science (80-. ).* *345*, 660–665.

1051 Zheng, C., Bieri, K.W., Hsiao, Y., and Colgin, L.L. (2016). Spatial Sequence Coding Differs  
1052 during Slow and Fast Gamma Rhythms in the Hippocampus. *Neuron* *89*, 398–408.

1053  
1054  
1055

1056 **STAR Methods**

1057

1058 **Neuron models**

1059 Our model has two classes of neurons: i) Poisson neurons; ii) Hodgkin-Huxley type (HH)  
1060 neurons.

1061 i) Poisson neurons

1062 There are four types of theta-oscillating neurons (excitatory neurons in CA3 and MECII,  
1063 VIP neurons in CA1 and GABAergic neurons in MS) and noise neurons. Other types of  
1064 neurons, that is, excitatory (E) neurons, fast spiking (PV) neurons and OLM neurons in  
1065 CA1, E and PV neurons in MECIII and E and PV neurons in MECV, are modeled as HH  
1066 neurons. 40 excitatory and 40 inhibitory noise neurons project to all HH neurons. Firing  
1067 rates of noise neurons are different depending on the cortical areas modeled: 35 [Hz]  
1068 in CA1 and in MECIII and 30 [Hz] in MECV.

1069 For theta-oscillating Poisson neurons, we described the theta-oscillating (10Hz)  
1070 probability of spiking per unit time  $P_x(t_1 < t < t_1 + \Delta t)$  ( $x=E$  in CA3 and MECII, VIP in  
1071 CA1, GABA in MS) as

1072 
$$P_x(t_1 < t < t_1 + \Delta t) = (\theta(A_x \left( \sin\left(2\pi\left(\frac{t}{T} - \theta_x\right)\right) + B_x\right)) + C_x)\Delta t,$$

1073 where  $\theta(s) = s$  when  $s > 0$  or otherwise 0.  $T = 100$  ms and  $\Delta t = 0.02$  ms is the step size  
1074 of our numerical simulation.  $A_x$  and  $B_x$  are the amplitude and preferred phase of  
1075 oscillating firing rate, respectively, and  $\theta_x$  is the preferred phase of theta oscillation for  
1076 the neuron type  $x$ , whereas  $C_x$  is the amplitude of background noise for inactive  
1077 subgroups outside of their place fields. We set the preferred phases based on previous  
1078 experimental studies (Borhegyi, 2004; Klausberger and Somogyi, 2008; Mizuseki et al.,  
1079 2009) as follows:

1080

1081  $x = \text{CA3}$ :

1082 CA3 neurons in the model are divided into four groups according to their spatial  
1083 preferences (Figure 1 and Circuit structure in STAR Methods). Their firing patterns are  
1084 changed depending on the present location of the model rat. When the model rat is in  
1085 Center ( $0 < t < 1000$  ms, sample-C and  $4500 \leq t < 7500$  ms, test-C), sample-Left  
1086 ( $1000 \leq t < 3000$  ms) and Home ( $3000 \leq t < 4500$ ms) positions, Center, Left, and  
1087 Home subgroups are activated, respectively.

1088 
$$A_x = 30 \text{ [Hz]}, B_x = 1, C_x = 0 \text{ [Hz]}, \theta_x = -0.2$$

1089 for neurons in an active subgroup, and

$$A_x = 0 \text{ [Hz]}, C_x = 3 \text{ [Hz]}$$

1090 for neurons in inactive subgroups.

1091

1092  $x = \text{ECII}$ :

1093 During the entire trial period, we set the parameters as

$$A_x = 5 [\text{Hz}], B_x = 0.6, C_x = 0 [\text{Hz}], \theta_x = -0.2$$

1094

1095  $x$  = GABAergic in MS:

1096 Three groups exist in the model, those projecting to PV in CA1, to OLM in CA1 and to  
1097 PV in MECV. The preferred theta phase of MECV PV-projecting GABAergic neurons is  
1098 the same as that of CA1 OLM-projecting GABAergic neurons,

$$A_x = 5 [\text{Hz}], B_x = 0.8, C_x = 0 [\text{Hz}], \theta_x = -0.1,$$

1100 whereas the preferred phases of CA1 PV-projecting neurons are different from the  
1101 above ones (Borhegyi, 2004) and given by

$$A_x = 5 [\text{Hz}], B_x = 2.0, C_x = 0 [\text{Hz}], \theta_x = -0.5.$$

1103

1104  $x$ =VIP:

1105 During the entire trial period, we set the parameters as

$$A_x = 20 [\text{Hz}], B_x = 0.3, C_x = 0 [\text{Hz}], \theta_x = -0.4.$$

1106

1107 Finally, we set a reference theta oscillation in CA1 SP as

$$A_x = 1, \theta_x = 0.5, B_x = 0, C_x = 0,$$

1108 which is a virtual oscillatory component used only for determining the relative  
1109 oscillation phases of other brain regions to theta oscillation in CA1 SP, but not for  
1110 numerically simulating the network model.

1111

1112 ii) HH neurons

1113 In our model, there are seven types of neurons; E, PV and OLM in CA1, and E and PV in  
1114 MECV and MECIII. PV neurons are modeled identically in all areas (Wang and Buzsáki,  
1115 1996). In the following equations,  $I_i$  is synaptic input from other neurons as described  
1116 in Circuit structure in STAR Methods. Dynamics of each type of neurons is described  
1117 below.

1118

1119 a) Excitatory neurons in CA1

1120 We modeled excitatory neurons in CA1 based on (Wulff et al., 2009). We additionally  
1121 included an afterhyperpolarization (AHP) and h currents in the model for generating a  
1122 weak subthreshold oscillation of the membrane potentials through interplay between  
1123 AHP (Middleton et al., 2008) and h current (Rotstein et al., 2006).

$$\begin{aligned} V_{Na} &= 50 [\text{mV}], V_K = -100.0 [\text{mV}], V_{AHP} = -100.0 [\text{mV}], V_h = -20.0 [\text{mV}], V_L \\ &= -67.0 [\text{mV}] \\ g_{Na} &= 100.0 [\text{mS}/\text{cm}^2], g_K = 80.0 [\text{mS}/\text{cm}^2], g_{AHP} = 0.2 [\text{mS}/\text{cm}^2], g_h \\ &= 0.1 [\text{mS}/\text{cm}^2], g_L = 0.1 [\text{mS}/\text{cm}^2] \\ C &= 1, I_{cst} = -0.1 \end{aligned}$$

$$C \frac{dV_i}{dt} = g_{Na} m_\infty(V)^3 h (V_{Na} - V_i) + g_K n^4 (V_K - V_i) + g_{AHP} w (V_{AHP} - V_i) + g_h (0.65hf + 0.35hs) (V_h - V_i) + g_L (V_L - V_i) + I_i + I_{const}$$

1124 The channel variable  $h$  is determined as

$$1125 \quad h = \max(1 - 1.25n, 0).$$

1126 Other channel variables evolve according to

$$1127 \quad \frac{dx}{dt} = \frac{x_\infty(V) - x}{\tau_x(V)},$$

1128 where  $x = m, n, w, hf$  and  $hs$ . Among these variables,  $m$  and  $n$  are determined by

1129

$$1130 \quad x_\infty(V) = \frac{\alpha_x(V)}{\alpha_x(V) + \beta_x(V)},$$

$$1131 \quad \tau_x(V) = 1 / (\alpha_x(V) + \beta_x(V)),$$

1132 where  $x$  stands for either  $m$  or  $n$ , and

$$1133 \quad \alpha_m(V) = -0.32(V + 54) / (\exp(-0.25 * (V + 54)) - 1),$$

$$1134 \quad \beta_m(V) = 0.28(V + 27) / (\exp(0.2 * (V + 27)) - 1),$$

$$\alpha_n(V) = -0.032(V + 52) / (\exp(-0.2 * (V + 52)) - 1),$$

$$1135 \quad \beta_n(V) = 0.5 \exp(-0.025(V + 57)).$$

1136 Other variables are determined by

$$w_\infty(V) = \frac{1}{\exp(-0.1(V + 41)) + 1}$$

$$\tau_w(V) = \frac{500}{3.3 \exp(0.05(V + 41)) + \exp(-0.05(V + 41))}$$

$$hf_\infty(V) = 1 / (1 + \exp(\frac{V + 79.2}{9.78}))$$

$$\tau_{hf}(V) = \frac{0.51}{\exp((V - 1.7)/10) + \exp(-(V + 340)/52)} + 1$$

$$1137 \quad hs_\infty(V) = 1 / \left(1 + \exp\left(\frac{V + 2.83}{15.9}\right)\right)^{58}$$

$$1138 \quad \tau_{hs}(V) = \frac{5.6}{\exp(\frac{V - 1.7}{14}) + \exp(\frac{-(V + 260)}{43})} + 1.$$

1139

1140 b) PV in CA1, MECIII, MECV

1141 We modeled PV neurons in CA1 as well as those in MECIII and MECV as described in

1142 (Wang and Buzsáki, 1996).

$$\begin{aligned} V_{Na} &= 55[mV], V_K = -90.0[mV], V_L = -65.0[mV] \\ g_{Na} &= 35.0[mS/cm^2], g_K = 9.0[mS/cm^2], g_L = 0.1[mS/cm^2] \\ C &= 1 \end{aligned}$$

$$C \frac{dV_i}{dt} = g_{Na} m_\infty(V)^3 h (V_{Na} - V_i) + g_K n^4 (V_K - V_i) + g_L (V_L - V_i) + I_i$$

$$\frac{dx}{dt} = \frac{x_{\infty}(V) - x}{\tau_x(V)}$$

$$x_{\infty}(V) = \frac{\alpha_x(V)}{\alpha_x(V) + \beta_x(V)}$$

1143

$$\tau_x(V) = 1/(\alpha_x(V) + \beta_x(V)),$$

1144 where the index  $x = n, h$  and  $m$ .

$$\alpha_m(V) = 0.1(V + 35)/(1 - \exp(-0.1(V + 35)))$$

$$\beta_m(V) = 4\exp\left(-\frac{V + 57}{40}\right)$$

$$\alpha_n(V) = 0.01(V + 34)/(1 - \exp(-(V + 34)))$$

$$\beta_n(V) = 0.125\exp(-(V + 44)/80)$$

$$\alpha_h(V) = 0.07\exp(-(V + 58)/20)$$

$$\beta_h(V) = 1/(\exp(-0.1(V + 28)) + 1)$$

1145

1146 c) OLM in CA1:

1147 We modeled OLM neurons as described in (Wulff et al., 2009).

$$V_{Na} = 60[mV], V_K = -100.0[mV], V_L = -70.0[mV], V_A = -90.0[mV], V_h$$

$$= -32.0[mV]$$

$$g_{Na} = 40.0[mS/cm^2], g_K = 23.0[mS/cm^2], g_A = 16.0[mS/cm^2], g_h$$

$$= 6.0[mS/cm^2], g_L = 0.05[mS/cm^2]$$

$$C = 1.3, I_{cnst} = 0.2$$

$$C \frac{dV_i}{dt} = g_{Na} m^3 h (V_{Na} - V_i) + g_K n^4 (V_K - V_i) + g_A a b (V_A - V_i) + g_h r (V_h - V_i)$$

$$+ g_L (V_L - V_i) + I_i + I_{cnst}$$

1148

$$\frac{dx}{dt} = \frac{x_{\infty}(V) - x}{\tau_x(V)}, \quad (\text{Eq.2})$$

1149

where  $x = m, h, n, a, b$  and  $r$ . The channel variables are determined by

1150

$$x_{\infty}(V) = \frac{\alpha_x(V)}{\alpha_x(V) + \beta_x(V)},$$

1151

$$\tau_x(V) = \frac{1}{\alpha_x(V) + \beta_x(V)}.$$

1152

for  $m, h$  and  $n$  with

$$\alpha_m(V) = -\frac{0.1(V + 38)}{\exp\left(-\frac{V + 38}{10}\right) - 1}$$

$$\beta_m(V) = 4\exp\left(-\frac{V + 65}{18}\right)$$

$$\alpha_h(V) = 0.07\exp\left(-\frac{V + 63}{20}\right)$$

$$\beta_h(V) = 1/(\exp(-0.1(V + 33)) + 1)$$



$$\alpha_n(V) = \frac{0.018(V - 25)}{1 - \exp\left(-\frac{V - 25}{25}\right)}$$

$$\beta_n(V) = \frac{0.0036(V - 35)}{\exp\left(\frac{V - 35}{12}\right) - 1}$$

1153 For  $x = a, b$  and  $r$ , variables in Eq.2 are determined by

$$a_\infty(V) = 1/(1 + \exp(-(V + 14)/16.6))$$

$$\tau_a(V) = 5$$

$$b_\infty(V) = 1/(1 + \exp((V + 71)/7.3))$$

$$\tau_b(V) = 1/\left(\frac{0.000009}{\exp\left(\frac{V - 26}{18.5}\right)} + \frac{0.014}{0.2 + \exp\left(-\frac{V + 70}{11}\right)}\right)$$

$$r_\infty(V) = 1/(1 + \exp((V + 84)/10.2))$$

$$\tau_r(V) = 1/(\exp(-14.59 - 0.086V) + \exp(-1.87 + 0.0701V))$$

1154

1155 d) Excitatory neurons in MECIII

1156 We modeled excitatory neurons in MECIII based on an excitatory neuron model of  
 1157 MECII (Middleton et al., 2008), with some modifications of parameter values. These  
 1158 neurons have an AHP current in addition to the standard sodium, potassium and leak  
 1159 currents. The model is described as

1160  $C=1.0$  [uF/cm<sup>2</sup>],

$$V_{Na} = 50[mV], V_K = -90.0[mV], V_{AHP} = -100.0[mV], V_L = -65.0[mV]$$

$$g_{Na} = 100.0 \left[ \frac{mS}{cm^2} \right], g_K = 80.0 \left[ \frac{mS}{cm^2} \right], g_{AHP} = 0.3 \left[ \frac{mS}{cm^2} \right]$$

$$g_L = 0.5[mS/cm^2]$$

1161  $C \frac{dV_i}{dt} = g_{Na} m^3 h (V_{Na} - V_i) + g_K n^4 (V_K - V_i) + g_{AHP} w (V_{AHP} - V_i) + g_L (V_L - V_i) + I_i$

1162  $\frac{dx}{dt} = \alpha_x(V)(1 - x) - \beta_x(V)x,$

1163 where  $x = m, n$  and  $h$ .

$$\alpha_m(V) = -0.32(V + 54)/(\exp(-0.25 * (V + 54)) - 1)$$

$$\beta_m(V) = 0.28(V + 27)/(\exp(0.2 * (V + 27)) - 1)$$

$$\alpha_n(V) = -0.032(V + 52)/(\exp(-0.2 * (V + 52)) - 1)$$

$$\beta_n(V) = 0.5 \exp(-0.025(V + 57))$$

$$\alpha_h(V) = 0.128 \exp(-(V + 50)/18)$$

1164  $\beta_h(V) = 4.0/\exp(-0.2(V + 27) + 1).$

1165 The channel variable  $w$  is determined by

1166  $\frac{dw}{dt} = (w_\infty(V) - w)/\tau_w(V),$

$$w_\infty(V) = \frac{1}{\exp(-0.1(V + 41)) + 1}$$

$$\tau_{\infty}(V) = \frac{500}{3.3 \exp(0.05(V + 41)) + \exp(-0.05(V + 41))}$$

1167

1168 e) Excitatory neurons in MECV

1169 excitatory neurons in MECV are modeled based on (Egorov et al., 2002; Fransén et al.,  
1170 2006) with simplification of conductance of nonspecific calcium-sensitive cationic,  
1171  $g_{CAN}$  (see Disinhibitory system in STAR Methods). Ca flux is regulated through CaL  
1172 channel.

$$\begin{aligned} V_{Na} &= 50[mV], V_K = -100[mV], V_{CAN} = -20[mV], V_{Ca} = 140[mV], V_L = -65[mV] \\ g_{Na} &= 100.0 \left[ \frac{mS}{cm^2} \right], g_K = 80.0 \left[ \frac{mS}{cm^2} \right], g_{AHP} = 0.05, g_{K,C} = 195 \left[ \frac{mS}{cm^2} \right], g_{K,C} \\ &= 195 \left[ \frac{mS}{cm^2} \right], g_M = 3.5, g_{CaL} = 0.15, g_{Na,p} = 0.2, g_{K,A} = 0.5, g_L \\ &= 0.5[mS/cm^2] \end{aligned}$$

$$\begin{aligned} 1173 \quad C \frac{dV_i}{dt} &= g_{Na} m^3 h (V_{Na} - V_i) + g_K n^4 (V_K - V_i) + g_{AHP} w (V_{AHP} - V_i) + g_M s_M (V_K - \\ 1174 \quad V_i) &+ g_{Na,p} s_{Na,p} h_{Na,p} (V_{Na} - V_i) + g_{K,A} s_{K,A} h_{K,A} (V_K - V_i) + g_{CAN}(t) s_{CAN} (V_{CAN} - \\ 1175 \quad V_i) &+ g_{K,C} s_{K,C} (V_K - V_i) + g_{CaL} s_{CaL} (V_{Ca} - V_i) + I_i \quad (\text{Eq.3}) \end{aligned}$$

1176 In addition to voltage dynamics, concentration of  $Ca^{2+}$ ,  $[Ca^{2+}]$ , in a neuron is modeled  
1177 according to:

$$\frac{d[Ca^{2+}]}{dt} = \kappa I_{CaL} - [Ca^{2+}]/\tau_{Ca}$$

1178 Here,  $\kappa = 0.5181937[Fd^{-1}]$  and  $\tau_{Ca} = 250[ms]$ .

1179 The standard current of sodium and potassium in Eq.3 are exactly same as in excitatory  
1180 neurons in MECIII. AHP, KA, KC, M, Na<sub>p</sub> and CaL currents follow the standard activation-  
1181 inactivation forms:

$$\frac{dx}{dt} = \alpha_x(V)(1-x) - \beta_x(V)x$$

1182  $x = w(= AHP), s_M(= M), s_{K,A}, h_{K,A}, s_{K,C}(= KC), s_{CaL}(= CaL)$ .

1183  $\alpha$  and  $\beta$  of each current are according to the following equations.:

$$\alpha_{AHP}(V) = \begin{cases} \min(2.4([Ca^{2+}] - 15), 15) & \text{for } [Ca^{2+}] > 15 \\ 0.2[Ca^{2+}] & \text{otherwise} \end{cases}$$

$$\beta_{AHP}(V) = 1$$

$$\alpha_{CaL}(C) = \frac{1.6}{1 + \exp(-0.072(V - 65))}$$

$$\beta_{CaL}(V) = \frac{0.02(V - 51.1)}{\exp(0.2(V - 51.1)) - 1}$$

$$\alpha_{KC}(V) = \begin{cases} \frac{\exp(0.053782V - 0.66835)}{18.975} & \text{for } V < 50 \\ 2 \exp\left(\frac{6.5 - V}{27}\right) & \text{otherwise} \end{cases}$$

$$\beta_{KC}(V) = \begin{cases} 2 \exp\left(\frac{6.5 - V}{27}\right) - \alpha_{KC} & \text{for } V < 50 \\ 0 & \text{otherwise} \end{cases}$$

$$\alpha_{s_{KA}}(V) = \frac{0.02(V - 13.1)}{1 - \exp(0.1(13.1 - V))}$$

$$\beta_{s_{KA}}(V) = \frac{0.175(V - 40.1)}{\exp(0.1(V - 40.1)) - 1}$$

$$\alpha_{h_{KA}}(V) = 0.0016 \exp(-(V + 13)/18)$$

$$\beta_{h_{KA}}(V) = 0.05 / (1 + 0.2 \exp(10.1 - V))$$

1184 Variables for M, Na<sub>p</sub> and CAN channels follow the form:

1185 
$$\frac{dx}{dt} = \frac{x_{\infty}(V) - x}{\tau_x(V)},$$

1186 where  $x = s_{Na,p}, h_{Na,p}, s_M (= M), s_{CAN} (= CAN)$ .  $x_{\infty}$  and  $\tau_x$  for each variables are  
1187 according to

$$s_{M,\infty}(V) = 1 / (1 + \exp(-V + 35)/5)$$

$$\tau_M(V) = \frac{1000}{3.3 \exp((V + 35)/40) + \exp(-(V + 35)/20)}$$

$$s_{Na,p,\infty}(V) = 1 / (1 + \exp\left(-\frac{V + 48.7}{4.4}\right))$$

$$\tau_{s_{Na,p}}(V) = \frac{1}{\left(\frac{0.091(V + 38)}{1 - \exp\left(\frac{V + 38}{5}\right)} - \frac{0.062(V + 38)}{1 - \exp\left(\frac{V + 38}{5}\right)}\right)}$$

$$h_{Na,p,\infty}(V) = \frac{1}{1 + \exp\left(-\frac{V + 48.8}{9.98}\right)}$$

$$\tau_{h_{Na,p}}(V) = \frac{1}{-\frac{0.00000288(V - 49.1)}{1 - \exp\left(-\frac{V - 49.1}{4.63}\right)} + \frac{0.00000694(V + 44.7)}{1 - \exp\left(-\frac{V + 44.7}{2.63}\right)}}$$

$$s_{CAN,\infty}(V) = 48 \times \frac{10^2 [Ca^{2+}]^2}{48 \times 10^2 [Ca^{2+}]^2 + 0.03}$$

$$\tau_{s_{CAN}}(V) = 1 / (48 \times 10^2 [Ca^{2+}]^2).$$

1188

1189

1190

1191

## 1192 Synaptic Inputs

1193 Synaptic input  $I_i$  to neuron  $i$  includes excitatory  $I_i^E$  and inhibitory  $I_i^I$  currents. Only in  
1194 CA1 neurons, OLM currents, which are from OLM neurons, are modeled as another  
1195 type of inhibitory currents based on (Wulff et al., 2009).

$$I_i(t) = I_i^E + I_i^I = g_i^E (V_E - V) + g_i^I (V_I - V) + g_i^{OLM} (V_i - V)$$

1196 
$$g_i^{E,I,OLM}(t) = \sum_k \int_0^t G_{ik} \sum_s \alpha^{E,I,OLM}(t' - t_k^s - d_{ik}) dt' \text{ (Eq.4),}$$

1197 where  $k$  is index of pre-synaptic neuron. For the excitatory current,  $k$  corresponds to  
 1198 index of excitatory neurons in all cortical areas and excitatory noise neurons projecting  
 1199 to post-synaptic neuron  $i$ . For the inhibitory currents,  $k$  corresponds to index of  
 1200 inhibitory neurons (PV, OLM, VIP, GABA) in all cortical areas and inhibitory noise  
 1201 neurons projecting to post-synaptic neuron  $i$ . Connections  $G$  among these neurons are  
 1202 described in Circuit model in STAR Methods.  $s$  is index of spikes in  $k$  neuron.  $d_{ik}$   
 1203 transduction time lag. When neurons  $i$  and  $k$  are within a same area,  $d$  is chosen  
 1204 randomly from (0,2) ms, while  $d$  is chosen from (10,15) ms for neurons in different  
 1205 areas. Double exponential functions,  $\alpha$ , are described as:

1206 
$$\alpha^{E,I,OLM}(t) = (e^{-\frac{t}{\tau_{E,I,OLM}^r}} - e^{-\frac{t}{\tau_{E,I,OLM}^d}}) / (\tau_{E,I,OLM}^r - \tau_{E,I,OLM}^d) \text{ (Eq.5)}$$

1207 Rise time constant  $\tau^r$  is 0.05,0.07 and 2.0 ms for E, I, and OLM, respectively, while decay  
 1208 time constant  $\tau^d$  is 5.3, 9.1 and 22.0 ms for E, I, and OLM, respectively.

1209

1210

1211 **Circuit structure**

1212 Our model has three cortical areas (Figure1A) and external oscillating neurons in MECII,  
 1213 CA3 and MS. excitatory neurons in each cortical area are divided into two or four  
 1214 subgroups (Table1). CA1 has four groups denoted as Left (L), Right (R), Center (C) and  
 1215 Home (H). MECIII and MECV have two groups denoted as L and R.

1216

1217 Table1: number of neurons in each are

|     | CA1   | ECIII | ECV   | CA3   |
|-----|-------|-------|-------|-------|
| E   | 120x4 | 120x2 | 200x2 | 120x4 |
| PV  | 240   | 160   | 120   |       |
| OLM | 240   |       |       |       |

1218

1219

1220

1221 In addition, a model has 240 VIP neurons in CA1, 120 excitatory neurons in MECII and  
 1222 360 GABAergic neurons in MS. The GABAergic neurons are divided into three groups  
 1223 projecting to different types of neuron each of which has 120 neurons; groups to OLM,  
 1224 to PV in CA1 and to PV in MECV.

1225 Structure of a circuit is given by a matrix  $G$  in Eq. 4, which represents efficacy of  
 1226 synaptic connections. Connection between presynaptic neuron  $j$  and postsynaptic  
 1227 neuron  $i$ ,  $G_{ij}$  is determined by

$$G_{ij} = \begin{cases} G_{XY}^{AB} / \rho_{XY}^{AB} N_Y^B & \text{with probability } \rho_{XY}^{AB} \\ 0 & \text{otherwise} \end{cases} \quad (\text{Eq.6}),$$

where X and Y are neuron types that  $i$  and  $j$  neurons belong to, respectively. A and B refer subgroups (L,R,C,and H) that  $i$  and  $j$  neurons belong to, respectively. Because only excitatory neurons in each area are divided as the subgroups, A and B are neglected for other types of neurons.  $N_Y$  is the number of type Y neurons. If the type Y neurons are divided into the subgroup,  $N_Y^B$  indicates the number of type Y neurons in subgroup B.  $G$  and  $\rho$  for each connection are as follows:

i) Connection from noise neurons

Connections  $G$  from noise neurons to the neurons in cortical areas are shown in Table2. A postsynaptic neuron receives inputs from 40 excitatory and 40 inhibitory neurons ( $\rho_{XY} = 1, N_{XY} = 40$ ).

Table2 Connection  $G_{XY}$  from noise neurons to each type of neurons.

| Post-synaptic X \ Pre-synaptic Y | CA1 |    |     | ECIII |    | ECV |    |
|----------------------------------|-----|----|-----|-------|----|-----|----|
|                                  | E   | PV | OLM | E     | PV | E   | PV |
| Excitatory noise neurons         | .32 | .8 | 3.2 | .8    | .2 | .2  | .4 |
| Inhibitory noise neurons         | .6  | .2 | .4  | .6    | .8 | .2  | .6 |

1242

1243

1244 ii) Connection from excitatory neurons in MECII, MS and CA3

1245 a) connection from excitatory neurons in MECII to PV in MECIII

$$G_{XY} = 0.4$$

$$\rho_{XY} = 1$$

1246 b) from GABAergic neurons in MS

1247 to PV in MECV

$$G_{XY} = 0.1$$

1248 to PV in CA1

$$G_{XY} = 3.7$$

1249 to OLM in CA1

$$G_{XY} = 3.7$$

1250 For all connections,

$$\rho_{XY} = 1$$

1251 c) from CA3 to E in CA1

1252 for  $A \neq B$

$$G_{XY}^{AB} = 0, \rho_{XY}^{AB} = 0$$

1253 For  $A = B$

$$G_{XY}^{AB} = 2.0\xi, \rho_{XY}^{AB} = 0.3$$

1254 here,  $\xi$  is chosen randomly from (0,1).

1255 d) from CA3 to PV in CA1

$$1256 \quad G_{XY} = 0.1 \quad \rho_{XY} = 0.5.$$

1257 e) from VIP to PV and OLM in CA1

1258 Efficacy of these connections are modified by [ACh] (Tremblay et al., 2016) as follows:

1259 For X=PV,

$$G_{XY} = 0.012[Ach], \rho_{XY} = 1$$

1260 For X=OLM,

$$G_{XY} = 0.02[Ach], \rho_{XY} = 1$$

1261 f) Connections between E neurons within the same cortical areas

1262 For  $A \neq B$

$$G_{XY}^{AB} = 0.01, \rho = 0.025 \text{ (in MECIII)}$$

$$G_{XY}^{AB} = 0, \rho = 0 \text{ (in MECV)}$$

1263 For  $A = B$

$$G_{XY}^{AB} = 14.4, \rho = 0.15 \text{ (in MECIII)}$$

$$G_{XY}^{AB} = 0.216, \rho = 0.03 \text{ (in MECV)}$$

1264 There is no connections between excitatory neurons in CA1 in our model.

1265

1266 g) Connection between neurons within the same cortical areas (except E-E  
1267 connections)

1268 There is no connections between OLMs(Wulff et al., 2009). Connections from OLM to E  
1269 neurons in CA1 are described in h), since OLM is observed to be attached on proximal  
1270 dendrite of excitatory neurons in CA1 and regulate inputs from MECIII.

1271

1272 Other connections within cortical areas are shown in Table 3.

1273

1274 Table 3: connection parameters in CA1, MECIII, MECV

|             | CA1  |      |       |        |       |        |
|-------------|------|------|-------|--------|-------|--------|
| (X,Y)       | E,PV | PV,E | PV,PV | PV,OLM | OLM,E | OLM,PV |
| $G_{XY}$    | 2.2  | 0.2  | 0.3   | 0.5    | 0.5   | 0.2    |
| $\rho_{XY}$ | 0.5  | 0.5  | 0.5   | 0.5    | 0.3   | 0.5    |

1275

| MECIII |      |       | MECV |      |       |
|--------|------|-------|------|------|-------|
| E,PV   | PV,E | PV,PV | E,PV | PV,E | PV,PV |
|        |      |       |      |      |       |

|     |     |      |     |     |      |
|-----|-----|------|-----|-----|------|
| 2.5 | 0.5 | 0.01 | 0.2 | 0.3 | 0.01 |
| 0.5 | 0.3 | 0.3  | 0.5 | 0.3 | 0.3  |

1276

1277 h) connections from neurons in CA1 to those in MECV

1278 For X=excitatory neurons in MECV, Y=excitatory neurons in CA1,

$$1279 \quad G_{XY}^{AB} = \begin{cases} 0.27 & \text{for } B \in \{H, C\} \\ 0.36 & \text{for } (A, B) \in \{(L, L), (R, R)\} \\ 0.00125 & \text{otherwise} \end{cases}, \quad \rho_{XY}^{AB} = \begin{cases} 0.075 & \text{for } B \in \{H, C\} \\ 0.075 & \text{for } (A, B) \in \{(L, L), (R, R)\} \\ 0.0125 & \text{otherwise} \end{cases}$$

1280 For X=PV neurons in MECV, Y=excitatory neurons in CA1,

$$G_{XY} = 0.01, \quad \rho_{XY} = 0.3$$

1281

1282 i) connections from neurons in MECV to those in MECIII

1283 For X= excitatory neurons in MECIII, Y=excitatory neurons in MECV,

$$1284 \quad G_{XY}^{AB} = \begin{cases} 0.01 & \text{for } A \neq B \\ 1.44 & \text{otherwise} \end{cases}, \quad \rho_{XY}^{AB} = \begin{cases} 0.0125 & \text{for } A \neq B \\ 0.075 & \text{otherwise} \end{cases}$$

1285

1286 j) connections from neurons in MECIII to those in CA1

1287 For X=excitatory neurons in CA1, Y=excitatory neurons in MECIII,

$$1288 \quad G_{XY}^{AB} = \begin{cases} 0.003 & \text{for } A \neq B \\ 0.216 & \text{otherwise} \end{cases}, \quad \rho_{XY}^{AB} = \begin{cases} 0.01 & \text{for } A \neq B \\ 0.06 & \text{otherwise} \end{cases}$$

1289 In addition, effect of OLM is implemented for modulating inputs from MECIII as  
1290 follows:

1291 Up to 5 ms after a spike from OLM to a E neurons in CA1, efficacy of connections from  
1292 E neurons in MECIII to this E neurons in CA1 is reduced with multiplication by 0.1.

1293

1294

### 1295 **Nonlinear interaction of excitatory neurons in CA1 with input from MECIII and CA3**

1296 E neurons integrate spikes from CA3 and MECIII (Bittner et al., 2015). We introduced  
1297 this effect in our model. A prolonged EPSC  $I_{prol}$  is supposed to be generated, when the  
1298 following conditions are satisfied:

- 1299 ● A excitatory neuron in CA1 receives a burst (three spikes within 15ms) from MECIII  
1300 and it does not receive any inhibitory input from OLM within 15ms at time  $t_1$ .
- 1301 ● This excitatory CA1 receives a burst (three spikes within 10ms) from CA3 within  
1302 20ms from  $t_1$  (denoted  $t_2$ ).
- 1303 ● Previous prolonged EPSC is 100ms earlier than  $t_2$ .

1304 If these conditions are satisfied, a prolonged (100ms) EPSC in E neuron in CA1 is  
1305 generated according to:

$$\alpha_{prol}(t) = \begin{cases} \frac{t}{5} & \text{for } 0 < t < 5[ms] \\ 1 - \frac{t-5}{60} & \text{for } 5 < t < 35 \\ 0.5 \exp\left(-\frac{t-35}{30}\right) & \text{for } 35 < t < 100 \\ 0 & \text{otherwise} \end{cases}$$

$$I_{prol}(t) = 0.01\alpha_{prol}(t)$$

1306

1307

1308 **Disinhibitory system and modulated conductance of nonspecific calcium-sensitive**  
 1309 **cationic (CAN) current through ACh.**

1310 We assume concentration of ACh represents cognitive states and changes dependent  
 1311 of current locations:

$$[ACh] = \begin{cases} 0.2 & \text{for } t < 1[s] \text{ (a rat on sample-C)} \\ 1 - 0.8 \exp\left(-\frac{t-T_{LS}}{200}\right) & \text{for } 1[s] \leq t < 3[s] \text{ (a rat on sample-L)} \\ 0.8 - 0.2 \exp\left(-\frac{t-T_H}{200}\right) & \text{for } 3[s] \leq t < 4.5[s] \text{ (a rat on sample-L)} \\ 1.1 - 0.3 \exp\left(-\frac{t-T_{CT}}{200}\right) & \text{for } 4.5[s] \leq t \text{ (a rat on test-C)} \end{cases}$$

1312 [ACh] modifies neural behavior in a circuit in two pathways. Efficacy of connections  
 1313 from VIP is modified with [ACh] (Circuit structure in STAR Methods) as well as  
 1314 conductance of  $I_{CAN}$ . Maximum conductance  $g_{CAN}$  is dependent on history of  $[Ca^{2+}]$   
 1315 and [ACh] (Fransén et al., 2006) as follows:

$$g_{CAN}(t) = 0.02[ACh]r_{high}(t)$$

$$r_{high}(t + \Delta t) = \begin{cases} r_{high}(t) + 1.5\Delta t & \text{for } [Ca^{2+}] > 0.004 \\ r_{high}(t) - 0.2\Delta t & \text{for } [Ca^{2+}] < 0.0003 \\ r_{high}(t) & \text{otherwise} \end{cases}$$

1316 We also set upper and lower bounds for  $r_{high}$  at 2.5 and 0.3, respectively.

1317

1318

1319 **An additional decoder**

1320 To examine how high gamma coherence between MECIII and CA1 observed in  
 1321 (Yamamoto et al., 2014) is utilized for detection of previous memories, we applied  
 1322 stimuli with high gamma oscillation to these areas and implemented an additional  
 1323 circuit as a decoder. The decoder circuit composes 100 excitatory (exc) and 100  
 1324 inhibitory (inh) neurons (Figure 7A) which receive synaptic inputs from excitatory  
 1325 neurons in MECIII and CA1. For the high gamma stimuli, we applied coherent current  
 1326 input  $I_{high \gamma}$  to excitatory neurons in CA1 and ECIII with  $f=80$  Hz as follows:



1327  $r_t = \sin(2\pi ft/1000)$ , here  $t=t[\text{ms}]$ ,

1328 
$$I_{\text{high } \gamma} = \begin{cases} 0.02mr_t & \text{for } mr_t > 0 \\ I_0r_t & \text{for } r_t \leq 0 \end{cases},$$

1329  $I_0 = 0.18$  for CA1 neurons, 0.216 for ECIII neurons.

1330

1331 Excitatory neurons are modeled as a normal HH neuron model:

$$\begin{aligned} C &= 1.0[\mu\text{F}/\text{cm}^2] \\ V_{Na} &= 50[\text{mV}], V_K = -90.0[\text{mV}], V_L = -65.0[\text{mV}] \\ g_{Na} &= 100.0[\text{mS}/\text{cm}^2], g_K = 80.0[\text{mS}/\text{cm}^2], g_L = 0.5[\text{mS}/\text{cm}^2] \\ C \frac{dV_i}{dt} &= g_{Na}m^3h(V_{Na} - V_i) + g_Kn^4(V_K - V_i) + g_L(V_L - V_i) + I_i + 0.1 \end{aligned}$$

1332 
$$\frac{dx}{dt} = \alpha_x(V)(1 - x) - \beta_x(V)x,$$

1333 where  $x=m,n$ , and  $h$ .

$$\alpha_m(V) = -0.32(V + 54)/(\exp(-0.25 * (V + 54)) - 1)$$

$$\beta_m(V) = 0.28(V + 27)/(\exp(0.2 * (V + 27)) - 1)$$

$$\alpha_n(V) = -0.032(V + 52)/(\exp(-0.2 * (V + 52)) - 1)$$

$$\beta_n(V) = 0.5 \exp(-0.025(V + 57))$$

$$\alpha_h(V) = 0.128 \exp(-(V + 50)/18)$$

1334 
$$\beta_h(V) = 4.0/\exp(-0.2(V + 27) + 1).$$

1335 Inhibitory neurons are modeled same as PV neurons in CA1, MECIII and MECV. Neurons  
 1336 in the decoder receive noisy excitatory and inhibitory synaptic inputs same as those in  
 1337 the main circuit (inputs from noise neurons in Synaptic structure). Excitatory and  
 1338 inhibitory neurons spike with 35[Hz]. Connection strength from 40 excitatory noise  
 1339 neurons to excitatory and inhibitory ones in the decoder,  $G_{EE}, G_{IE} = 0.005, 0.05$ , while  
 1340 those from 40 inhibitory noisy neurons to excitatory and inhibitory ones in the decoder,  
 1341  $G_{EI}, G_{II} = 0.02, 0.0015$ . For alpha function in Eq.5 for both of the excitatory and  
 1342 inhibitory neurons in the decoder, we set  $\tau_{dcy} = 4$  ms and other parameters are same  
 1343 as the main circuit.

1344

1345 In the decoder circuit, 100 excitatory neurons are divided into two sub groups, L (50  
 1346 neurons) and R (50 neurons), as well as 100 inhibitory neurons. Synaptic inputs from  
 1347 these neuron and excitatory neurons in CA1 and MECIII are modeled as Eq.4. Circuit  
 1348 structure of the decoder is set according to Table 4. We also set time-lag  $d$  through  
 1349 synaptic inputs;  $d$  from MECIII and CA1 to the excitatory neurons is chosen randomly  
 1350 from (35,50) and (10,15) ms, respectively.  $d$  from those to the inhibitory neurons is  
 1351 chosen randomly from (22.5,27.5) and (10,15) ms, respectively.

1352

1353 Table 4: circuit structure of the decoder

| pre<br>post | E      | I           | E in CA1    | E in MECIII |
|-------------|--------|-------------|-------------|-------------|
| E           | 0<br>0 | 2.5<br>0.8  | 0.4<br>0.1  | 0.02<br>0.1 |
| I           | 0<br>0 | 0.05<br>0.6 | 0.45<br>0.4 | 0.3<br>0.2  |

1354 For each cell, upper and lower values are  $G_{post,pre}$  and  $\rho_{post,pre}$  in Eq.6, respectively.

1355

1356 We implemented nonlinear amplifications of inputs from MECIII and CA1 as similar to  
 1357 that in the excitatory neurons in CA1. To be specific, when both inputs arrive to the  
 1358 neuron in the decoder within 1 ms, input currents are amplified by 4.5-fold and 2.0-  
 1359 fold in excitatory and inhibitory neurons, respectively.

1360

1361

### 1362 **Experimental data in rats**

1363 Spiking activities and LFP data in CA1 are obtained from previously published data in  
 1364 (Yamamoto et al., 2014) for Figures 5B and 6C and that in (Mizuseki et al., 2013) for  
 1365 Figures 5D and 5E. Experiments were approved by the Institutional Animal Care and Use  
 1366 Committee of Rutgers University. All procedures for animal care and use were performed in  
 1367 accordance with the National Institutes of Health *Guide for the Care and Use of Laboratory*  
 1368 *Animals*. Detailed conditions on data recording are described in these papers.

1369

1370 LFP activities were band-pass filtered (6-12Hz) as theta wave and instantaneous phase  
 1371 of the filtered theta wave were derived from Hilbert transform. For spiking activities,  
 1372 we dropped a part of spikes to analyzed as follows:

1373 Spiking activities in (Yamamoto et al., 2014) were recorded with the silicon linear  
 1374 probes and were analyzed as multi-unit activities. In this paper, however, we roughly  
 1375 distinguish putative excitatory neurons from inhibitory ones in order to show clear  
 1376 theta preference. According to (Mizuseki et al., 2009), we sorted spikes by trough to  
 1377 peak latency. Due to short length of single spike profile in the data, we cannot identify  
 1378 baseline before spike and consequently cannot compute peak amplitude asymmetry.  
 1379 We assigned spikes with the latency larger than 0.5ms to putative excitatory neurons.  
 1380 For Figure 5B, we have the sorted spikes in three out of five rats because spikes of the  
 1381 rest two rats do not show clear theta preference due to small number of spikes.

1382 For spiking activities in (Mizuseki et al., 2013), we used sessions  
 1383 "ec014.12","ec014.16","ec014.17","ec014.27","ec014.28","ec013.44","ec013.46","ec0  
 1384 16.30". Because phase shift in the side arm was observed only in deeper neurons in

1385 (Fernández-Ruiz et al., 2017), we only used spikes of deeper neurons according to  
1386 (Mizuseki et al., 2011).  
1387  
1388

Figure 1

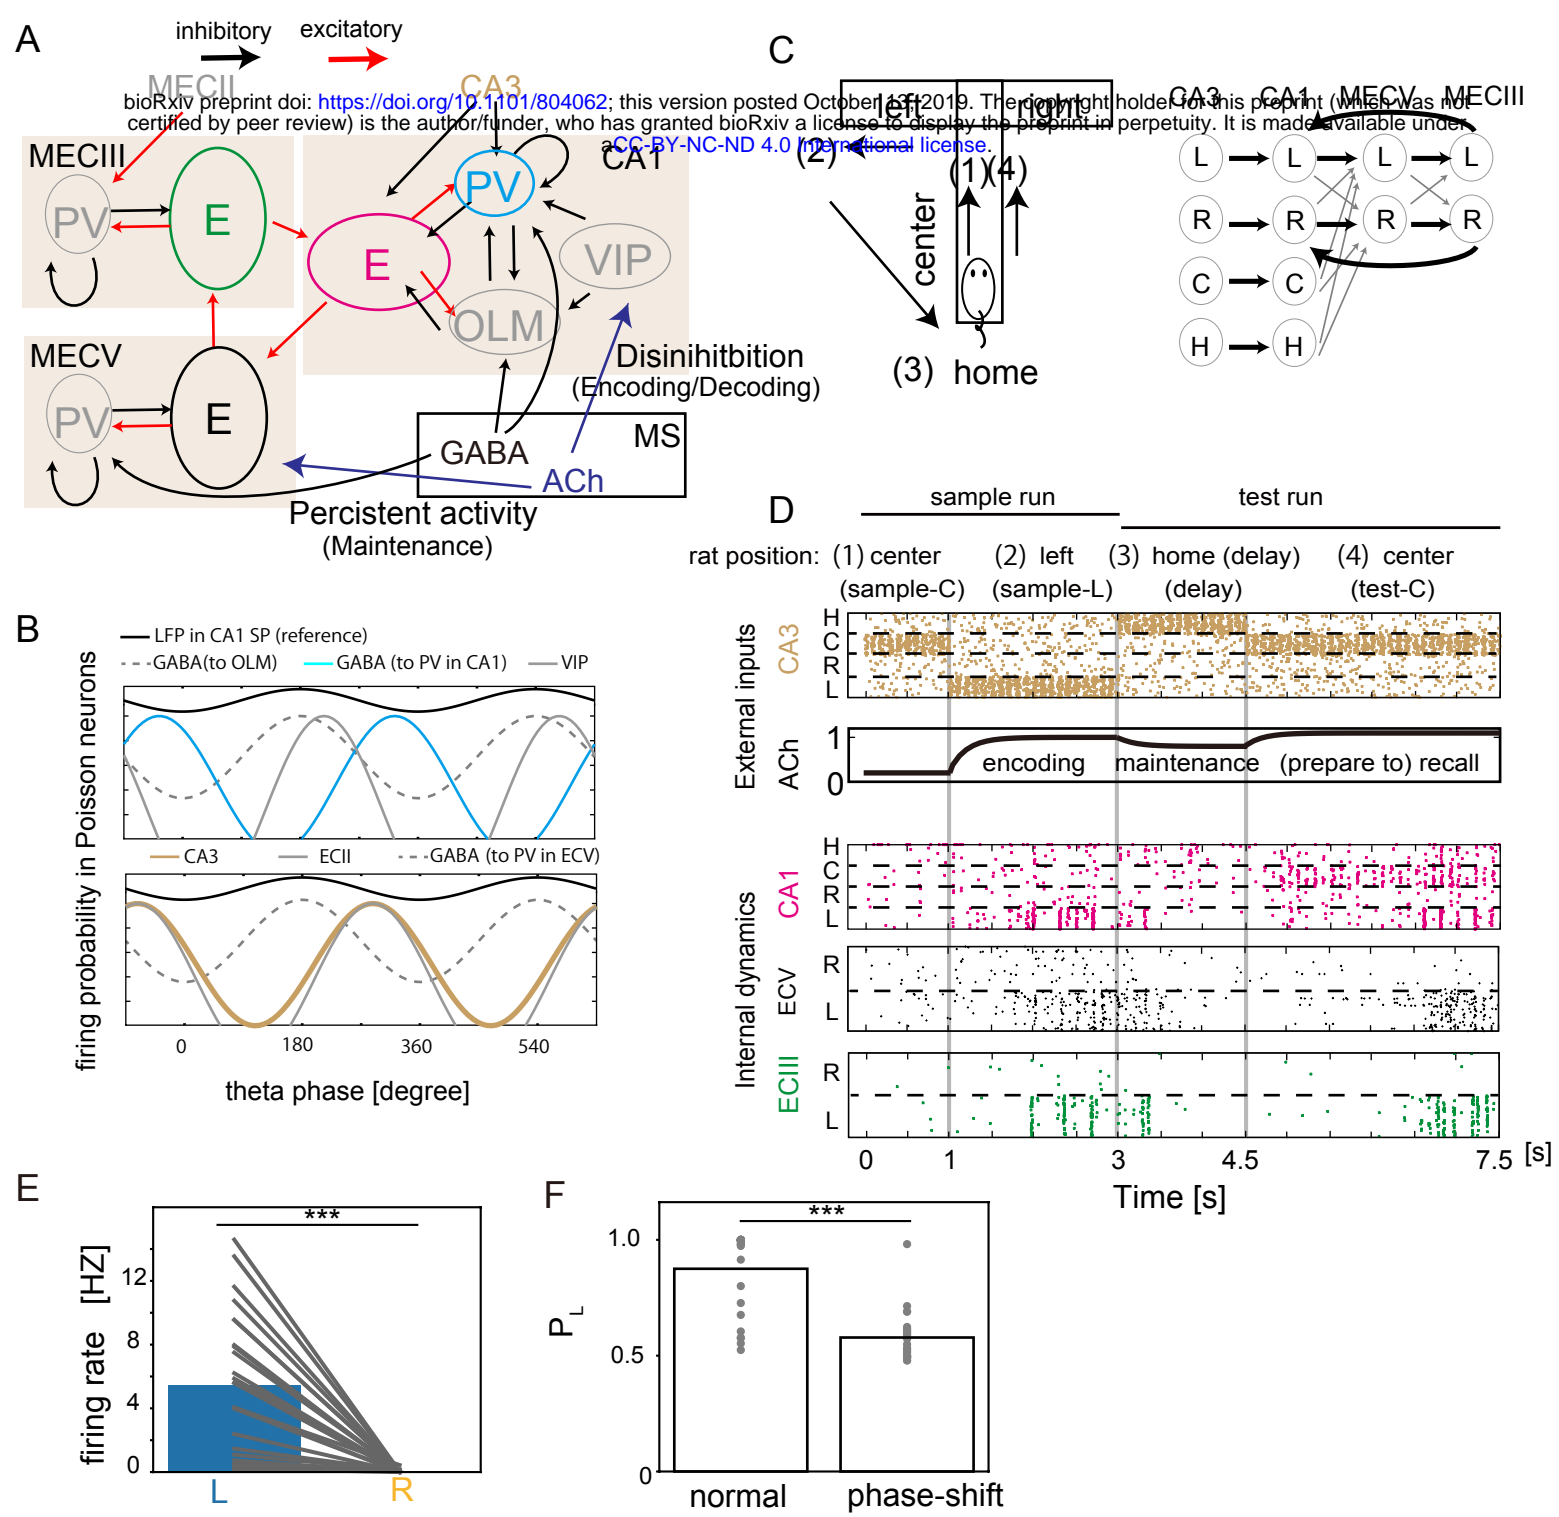

Figure 2

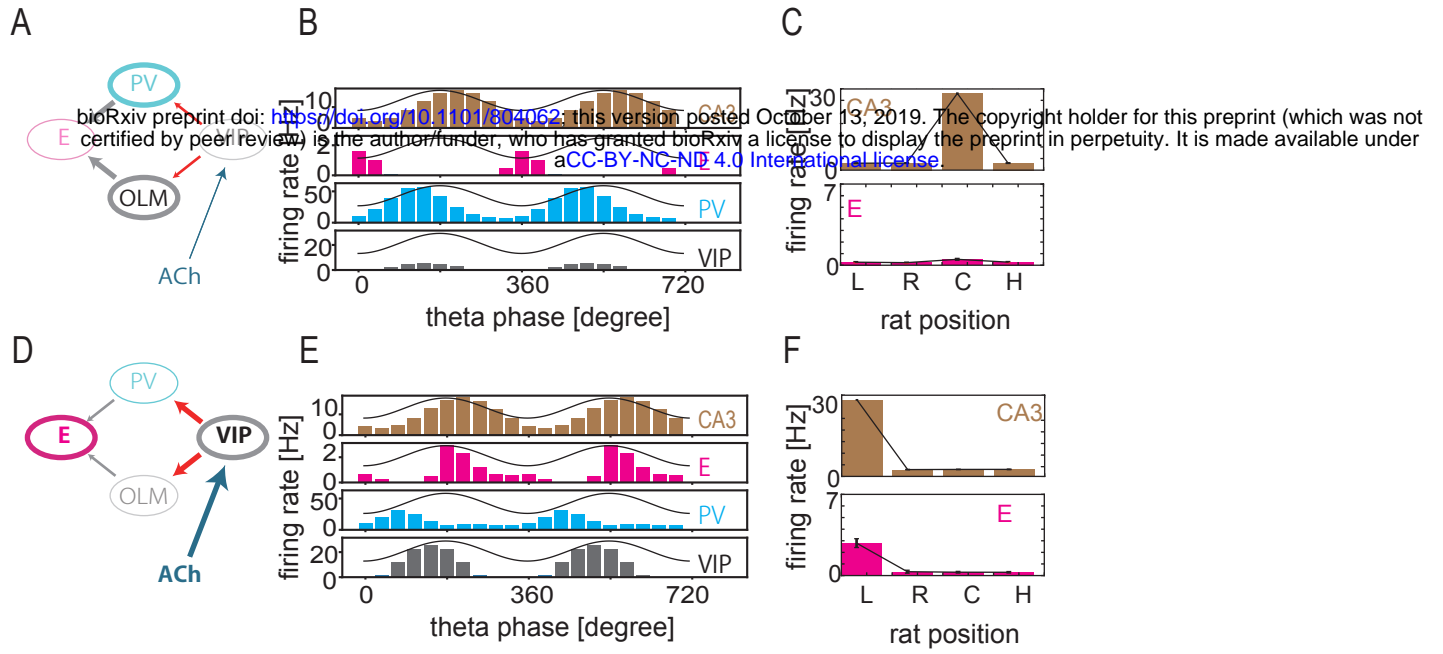

Figure 3

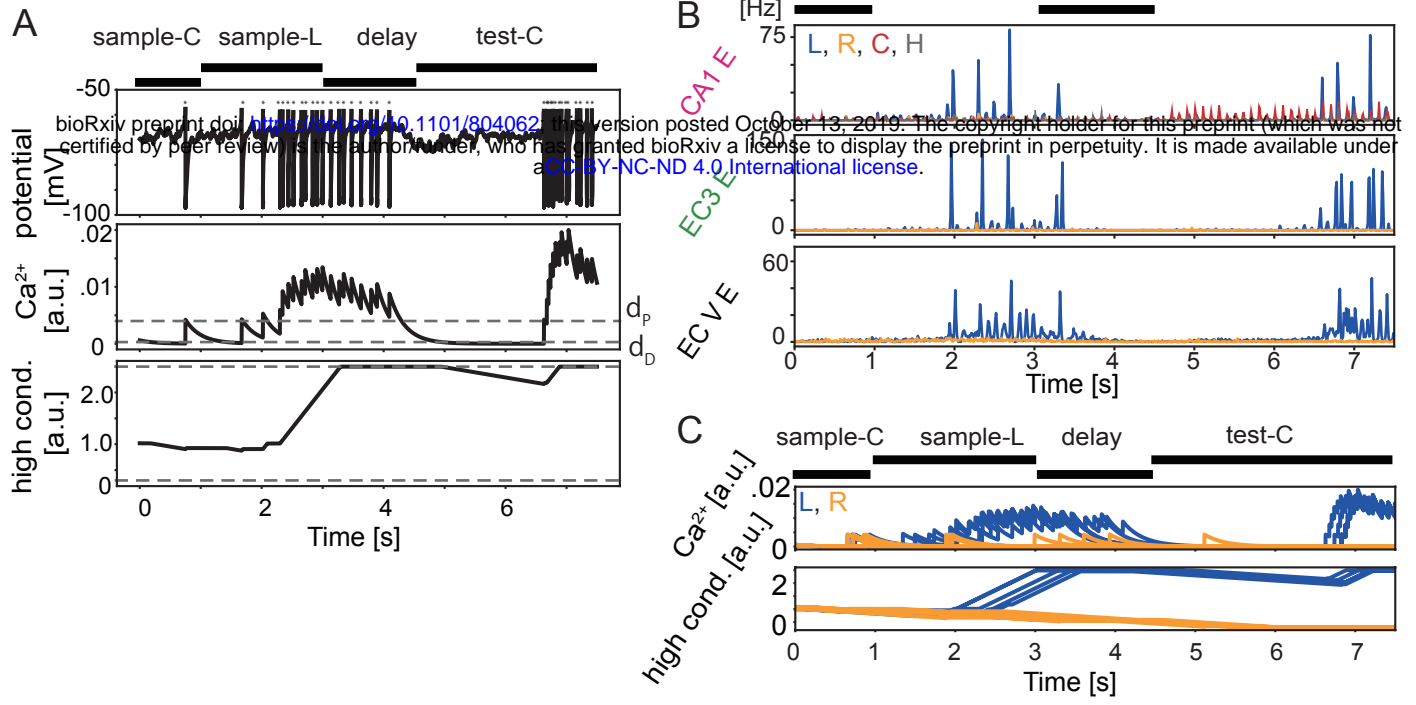

Figure 4

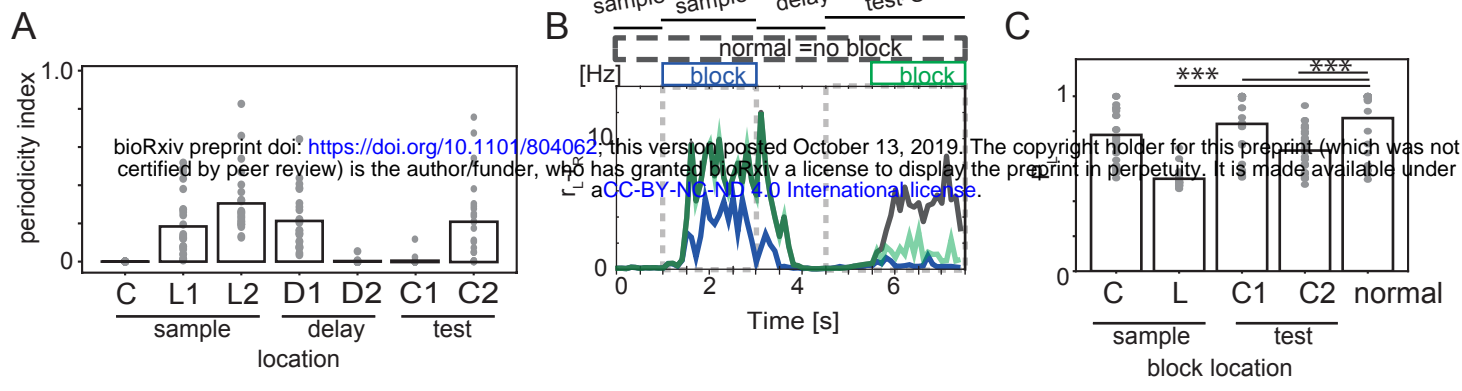

Figure 5

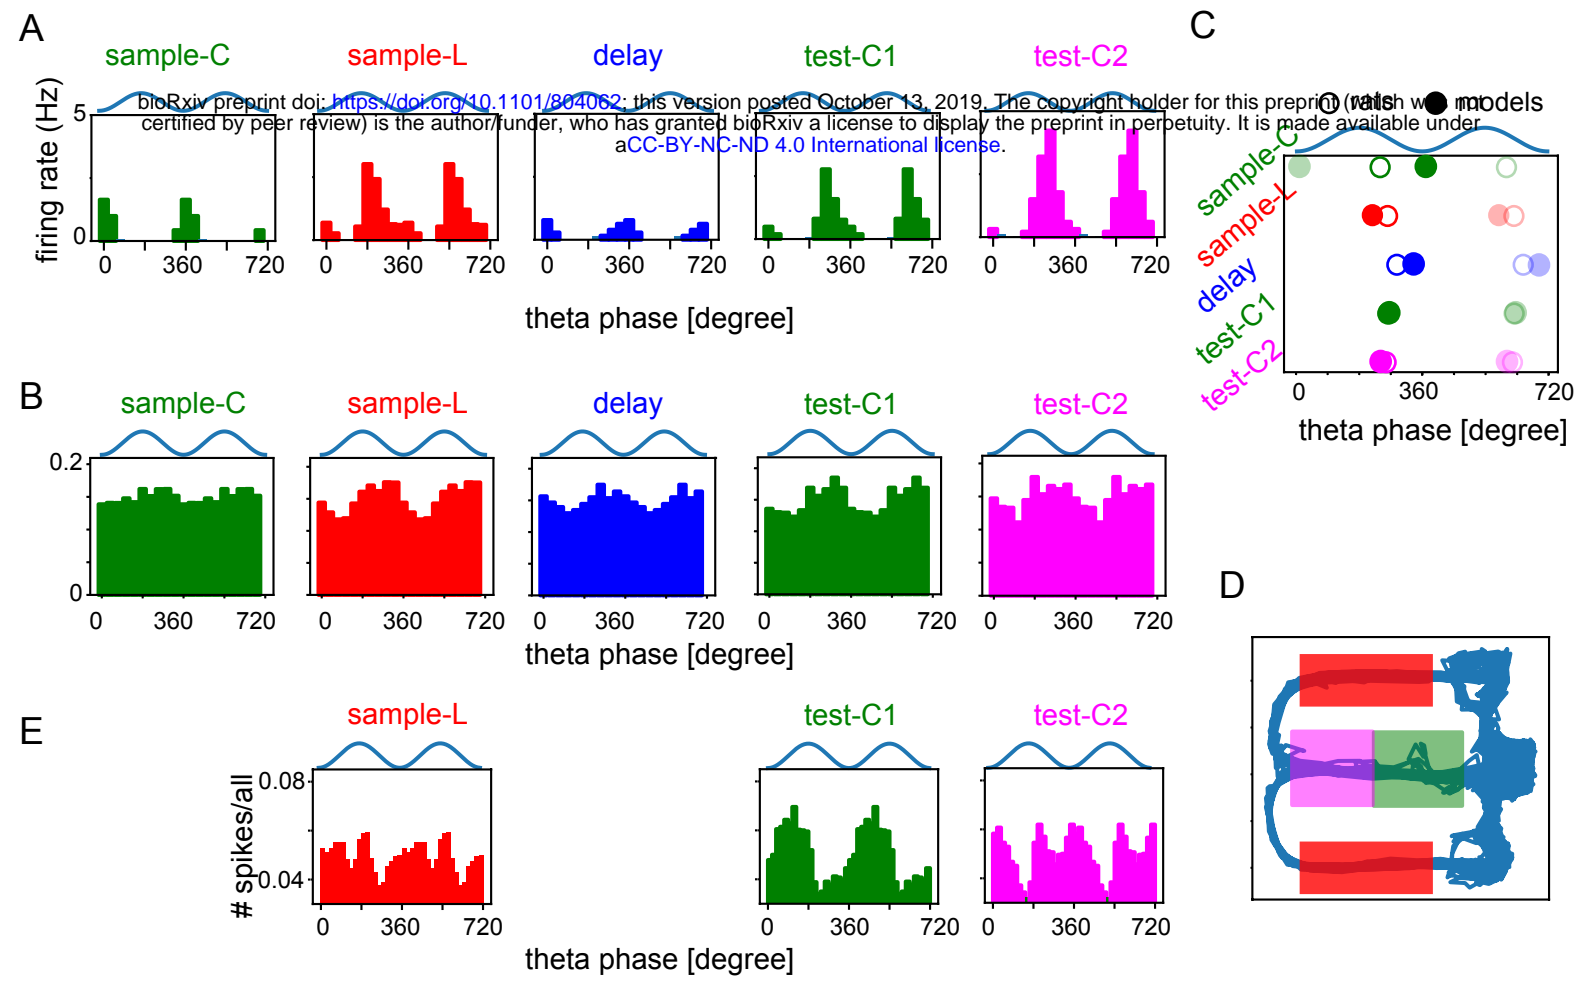



Figure 6

A

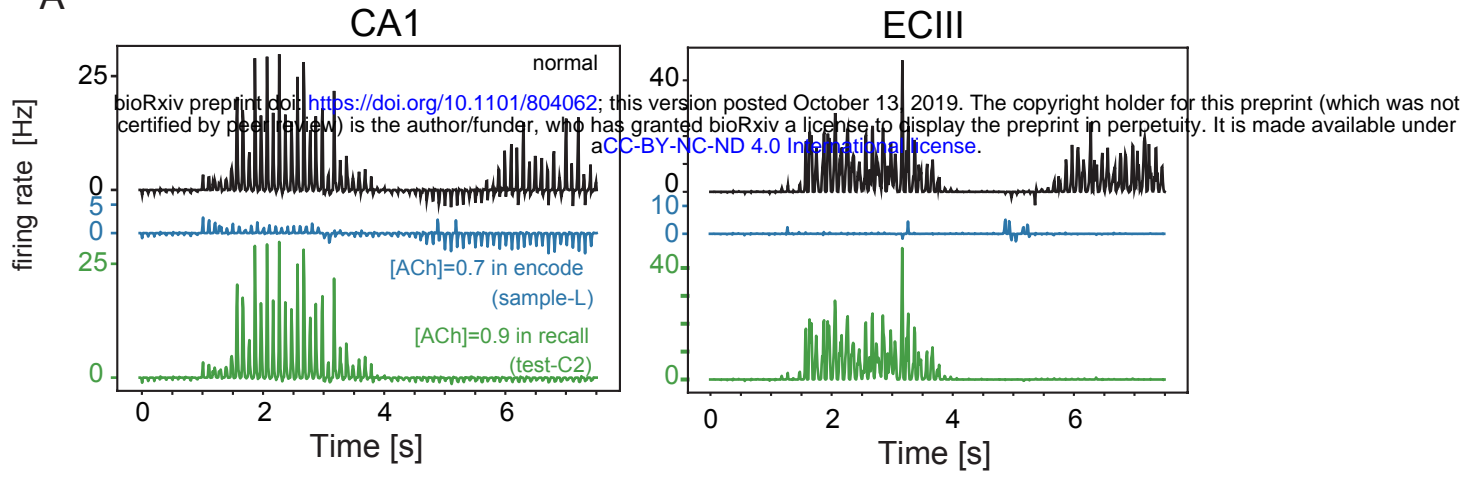

B

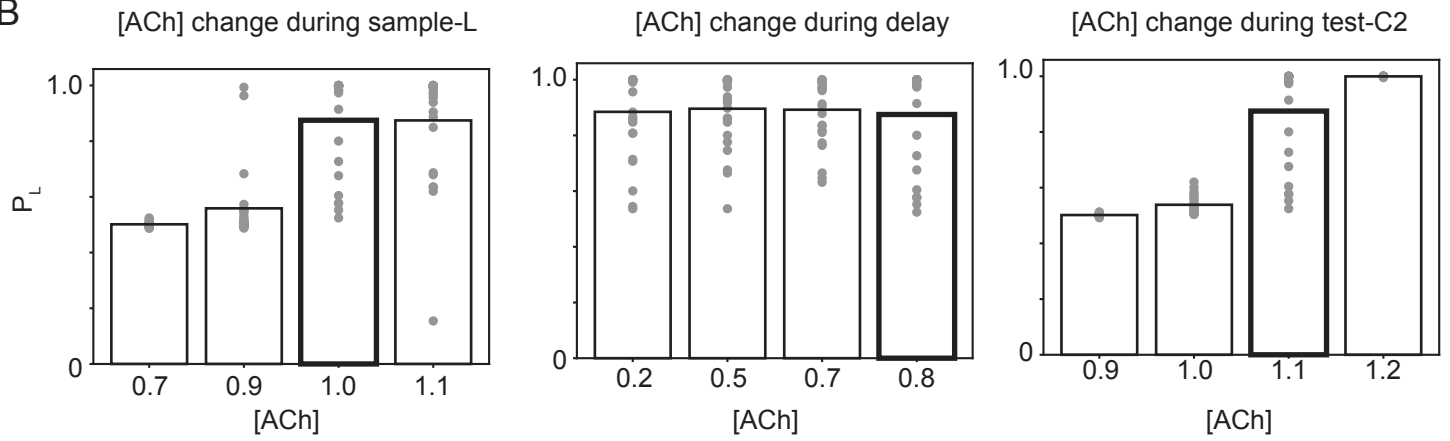

C

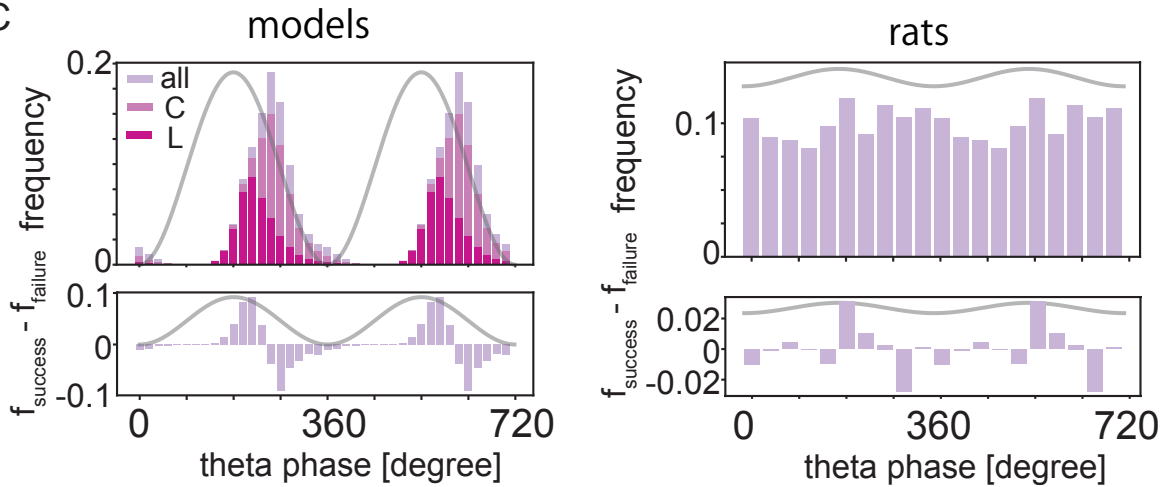

Figure 7

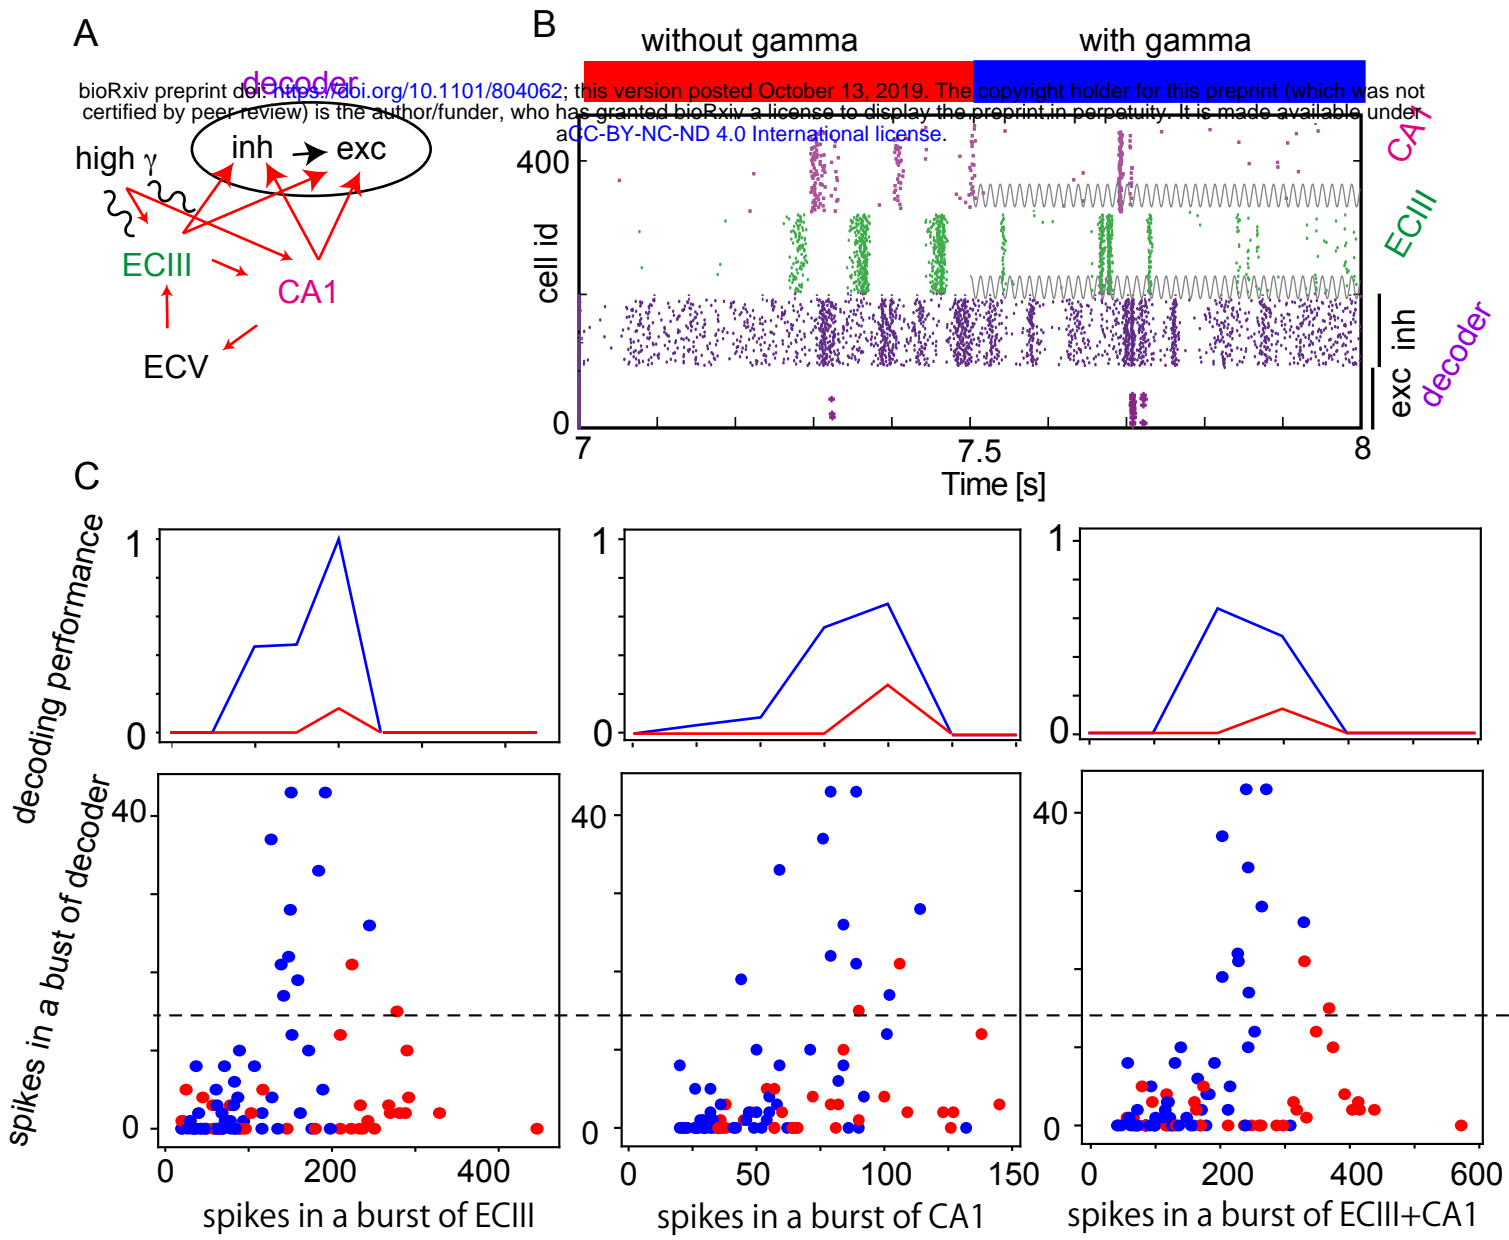

Source: https://www.biorxiv.org/content/10.1101/804062v1.full.pdf
